# Supplementary material for: Machine learning-based construction of immunogenic cell death-related score for improving prognosis and response to immunotherapy in melanoma
Source: Aging (Albany NY). 2023 Apr 6;15(7):2667–88. doi: 10.18632/aging.204636 (PMC10120887; doi:10.18632/aging.204636)
Supplement: Supplementary Table 1 [file aging-15-204636-s002.xlsx]

## Sheet: Sheet1
Supplementary Table 1. GSEA results of Cluster A and B in the TCGA-SKCM dataset.
ID	enrichmentScore	NES	p.adjust	qvalues
GOBP_LYMPHOCYTE_MEDIATED_IMMUNITY	0.912805	2.36794	4.12e-09	3.18e-09
GOBP_LEUKOCYTE_MEDIATED_IMMUNITY	0.900042	2.36601	4.12e-09	3.18e-09
GOBP_ADAPTIVE_IMMUNE_RESPONSE_BASED_ON_SOMATIC_RECOMBINATION_OF_IMMUNE_RECEPTORS_BUILT_FROM_IMMUNOGLOBULIN_SUPERFAMILY_DOMAINS	0.911623	2.36555	4.12e-09	3.18e-09
GOBP_POSITIVE_REGULATION_OF_CELL_ACTIVATION	0.895056	2.3373	4.12e-09	3.18e-09
GOBP_ACTIVATION_OF_IMMUNE_RESPONSE	0.898324	2.33561	4.12e-09	3.18e-09
GOBP_IMMUNE_RESPONSE_REGULATING_CELL_SURFACE_RECEPTOR_SIGNALING_PATHWAY	0.906075	2.33528	4.12e-09	3.18e-09
GOBP_IMMUNE_RESPONSE_REGULATING_SIGNALING_PATHWAY	0.879702	2.31747	4.12e-09	3.18e-09
GOBP_HUMORAL_IMMUNE_RESPONSE	0.902755	2.31489	4.12e-09	3.18e-09
GOBP_B_CELL_MEDIATED_IMMUNITY	0.93297	2.30925	4.12e-09	3.18e-09
GOBP_ANTIGEN_RECEPTOR_MEDIATED_SIGNALING_PATHWAY	0.92098	2.30578	4.12e-09	3.18e-09
GOBP_B_CELL_ACTIVATION	0.892758	2.30505	4.12e-09	3.18e-09
GOBP_PHAGOCYTOSIS	0.897242	2.29687	4.12e-09	3.18e-09
GOBP_PRODUCTION_OF_MOLECULAR_MEDIATOR_OF_IMMUNE_RESPONSE	0.889047	2.28406	4.12e-09	3.18e-09
GOBP_IMMUNOGLOBULIN_PRODUCTION	0.913677	2.28054	4.12e-09	3.18e-09
GOBP_REGULATION_OF_B_CELL_ACTIVATION	0.926715	2.27805	4.12e-09	3.18e-09
GOBP_B_CELL_RECEPTOR_SIGNALING_PATHWAY	0.95378	2.25919	4.12e-09	3.18e-09
GOBP_DEFENSE_RESPONSE_TO_BACTERIUM	0.871066	2.25751	4.12e-09	3.18e-09
GOBP_COMPLEMENT_ACTIVATION	0.946725	2.25044	4.12e-09	3.18e-09
GOBP_HUMORAL_IMMUNE_RESPONSE_MEDIATED_BY_CIRCULATING_IMMUNOGLOBULIN	0.953284	2.24829	4.12e-09	3.18e-09
GOBP_MEMBRANE_INVAGINATION	0.931002	2.23982	4.12e-09	3.18e-09
GOBP_POSITIVE_REGULATION_OF_B_CELL_ACTIVATION	0.933557	2.23357	4.12e-09	3.18e-09
GOBP_LEUKOCYTE_CELL_CELL_ADHESION	0.851054	2.21886	4.12e-09	3.18e-09
GOBP_CELL_RECOGNITION	0.883028	2.21113	4.12e-09	3.18e-09
GOBP_T_CELL_ACTIVATION	0.837952	2.2075	4.12e-09	3.18e-09
GOBP_PHAGOCYTOSIS_RECOGNITION	0.955111	2.2007	4.12e-09	3.18e-09
GOBP_POSITIVE_REGULATION_OF_LEUKOCYTE_CELL_CELL_ADHESION	0.870378	2.19251	4.12e-09	3.18e-09
GOBP_REGULATION_OF_T_CELL_ACTIVATION	0.847138	2.19165	4.12e-09	3.18e-09
GOBP_POSITIVE_REGULATION_OF_CELL_CELL_ADHESION	0.855475	2.18632	4.12e-09	3.18e-09
GOBP_CELL_ACTIVATION_INVOLVED_IN_IMMUNE_RESPONSE	0.849058	2.16722	4.12e-09	3.18e-09
GOBP_LEUKOCYTE_PROLIFERATION	0.837646	2.16334	4.12e-09	3.18e-09
GOBP_REGULATION_OF_IMMUNE_EFFECTOR_PROCESS	0.831389	2.15793	4.12e-09	3.18e-09
GOBP_MONONUCLEAR_CELL_DIFFERENTIATION	0.820555	2.15246	4.12e-09	3.18e-09
GOBP_REGULATION_OF_LEUKOCYTE_PROLIFERATION	0.849151	2.14979	4.12e-09	3.18e-09
GOBP_POSITIVE_REGULATION_OF_CYTOKINE_PRODUCTION	0.812769	2.13701	4.12e-09	3.18e-09
GOBP_LEUKOCYTE_MEDIATED_CYTOTOXICITY	0.891925	2.13649	4.12e-09	3.18e-09
GOBP_REGULATION_OF_CELL_CELL_ADHESION	0.812478	2.13533	4.12e-09	3.18e-09
GOBP_REGULATION_OF_LEUKOCYTE_MEDIATED_IMMUNITY	0.850911	2.13257	4.12e-09	3.18e-09
GOBP_CELL_KILLING	0.865802	2.13079	4.12e-09	3.18e-09
GOBP_T_CELL_DIFFERENTIATION	0.838858	2.13044	4.12e-09	3.18e-09
GOBP_NEGATIVE_REGULATION_OF_IMMUNE_SYSTEM_PROCESS	0.813982	2.12629	4.12e-09	3.18e-09
GOBP_ANTIGEN_PROCESSING_AND_PRESENTATION	0.907112	2.12497	4.12e-09	3.18e-09
GOBP_CYTOKINE_MEDIATED_SIGNALING_PATHWAY	0.806064	2.12417	4.12e-09	3.18e-09
GOBP_MYELOID_LEUKOCYTE_ACTIVATION	0.844012	2.11528	4.12e-09	3.18e-09
GOBP_REGULATION_OF_ADAPTIVE_IMMUNE_RESPONSE	0.86104	2.11295	4.12e-09	3.18e-09
GOBP_POSITIVE_REGULATION_OF_LEUKOCYTE_PROLIFERATION	0.866164	2.10825	4.12e-09	3.18e-09
GOBP_LEUKOCYTE_MIGRATION	0.80751	2.10641	4.12e-09	3.18e-09
GOBP_LYMPHOCYTE_ACTIVATION_INVOLVED_IN_IMMUNE_RESPONSE	0.848564	2.10237	4.12e-09	3.18e-09
GOBP_REGULATION_OF_LYMPHOCYTE_MEDIATED_IMMUNITY	0.86265	2.10116	4.12e-09	3.18e-09
GOBP_MONONUCLEAR_CELL_MIGRATION	0.848713	2.09943	4.12e-09	3.18e-09
GOBP_ALPHA_BETA_T_CELL_ACTIVATION	0.864259	2.09921	4.12e-09	3.18e-09
GOBP_REGULATION_OF_LEUKOCYTE_DIFFERENTIATION	0.822197	2.09866	4.12e-09	3.18e-09
GOBP_POSITIVE_REGULATION_OF_CELL_ADHESION	0.797473	2.09638	4.12e-09	3.18e-09
GOBP_POSITIVE_REGULATION_OF_IMMUNE_EFFECTOR_PROCESS	0.832718	2.09486	4.12e-09	3.18e-09
GOBP_T_CELL_PROLIFERATION	0.838447	2.08315	4.12e-09	3.18e-09
GOBP_REGULATION_OF_LYMPHOCYTE_DIFFERENTIATION	0.84797	2.08087	4.12e-09	3.18e-09
GOBP_POSITIVE_REGULATION_OF_RESPONSE_TO_EXTERNAL_STIMULUS	0.792172	2.07845	4.12e-09	3.18e-09
GOBP_T_CELL_ACTIVATION_INVOLVED_IN_IMMUNE_RESPONSE	0.87629	2.07652	4.12e-09	3.18e-09
GOBP_RESPONSE_TO_INTERFERON_GAMMA	0.865558	2.07553	4.12e-09	3.18e-09
GOBP_REGULATION_OF_T_CELL_DIFFERENTIATION	0.853821	2.07415	4.12e-09	3.18e-09
GOBP_POSITIVE_REGULATION_OF_T_CELL_PROLIFERATION	0.886665	2.07286	4.12e-09	3.18e-09
GOBP_REGULATION_OF_T_CELL_PROLIFERATION	0.84771	2.0684	4.12e-09	3.18e-09
GOBP_INTERFERON_GAMMA_PRODUCTION	0.873601	2.06822	4.12e-09	3.18e-09
GOBP_REGULATION_OF_INNATE_IMMUNE_RESPONSE	0.823903	2.06567	4.12e-09	3.18e-09
GOBP_POSITIVE_REGULATION_OF_LEUKOCYTE_MEDIATED_IMMUNITY	0.856844	2.06141	4.12e-09	3.18e-09
GOBP_POSITIVE_REGULATION_OF_DEFENSE_RESPONSE	0.807833	2.06043	4.12e-09	3.18e-09
GOBP_T_CELL_MEDIATED_IMMUNITY	0.872129	2.05868	4.12e-09	3.18e-09
GOBP_REGULATION_OF_RESPONSE_TO_BIOTIC_STIMULUS	0.794196	2.05716	4.12e-09	3.18e-09
GOBP_RESPONSE_TO_MOLECULE_OF_BACTERIAL_ORIGIN	0.792533	2.0568	4.12e-09	3.18e-09
GOBP_TUMOR_NECROSIS_FACTOR_SUPERFAMILY_CYTOKINE_PRODUCTION	0.835653	2.05659	4.12e-09	3.18e-09
GOBP_LEUKOCYTE_CHEMOTAXIS	0.818286	2.05081	4.12e-09	3.18e-09
GOBP_ALPHA_BETA_T_CELL_DIFFERENTIATION	0.867917	2.05037	4.12e-09	3.18e-09
GOBP_NEGATIVE_REGULATION_OF_CELL_ACTIVATION	0.820926	2.05032	4.12e-09	3.18e-09
GOBP_POSITIVE_REGULATION_OF_LYMPHOCYTE_MEDIATED_IMMUNITY	0.868419	2.04814	4.12e-09	3.18e-09
GOBP_REGULATION_OF_CELL_KILLING	0.876685	2.04813	4.12e-09	3.18e-09
GOBP_REGULATION_OF_INFLAMMATORY_RESPONSE	0.783005	2.04616	4.12e-09	3.18e-09
GOBP_NEGATIVE_REGULATION_OF_IMMUNE_RESPONSE	0.833357	2.04571	4.12e-09	3.18e-09
GOBP_LYMPHOCYTE_MIGRATION	0.863065	2.04323	4.12e-09	3.18e-09
GOBP_RESPONSE_TO_CHEMOKINE	0.87713	2.04043	4.12e-09	3.18e-09
GOBP_MYELOID_LEUKOCYTE_MIGRATION	0.815224	2.04018	4.12e-09	3.18e-09
GOBP_CELL_CHEMOTAXIS	0.793616	2.03979	4.12e-09	3.18e-09
GOBP_NEUTROPHIL_MIGRATION	0.855666	2.03917	4.12e-09	3.18e-09
GOBP_REGULATION_OF_LEUKOCYTE_MEDIATED_CYTOTOXICITY	0.893791	2.03912	4.12e-09	3.18e-09
GOBP_B_CELL_PROLIFERATION	0.874429	2.03794	4.12e-09	3.18e-09
GOBP_POSITIVE_REGULATION_OF_HEMOPOIESIS	0.836848	2.03518	4.12e-09	3.18e-09
GOBP_GRANULOCYTE_MIGRATION	0.837605	2.03476	4.12e-09	3.18e-09
GOBP_POSITIVE_REGULATION_OF_ADAPTIVE_IMMUNE_RESPONSE	0.86385	2.03029	4.12e-09	3.18e-09
GOBP_CELLULAR_RESPONSE_TO_MOLECULE_OF_BACTERIAL_ORIGIN	0.811283	2.02903	4.12e-09	3.18e-09
GOBP_CELLULAR_RESPONSE_TO_INTERFERON_GAMMA	0.856656	2.0281	4.12e-09	3.18e-09
GOBP_NEGATIVE_REGULATION_OF_LYMPHOCYTE_ACTIVATION	0.832915	2.02732	4.12e-09	3.18e-09
GOBP_POSITIVE_REGULATION_OF_LYMPHOCYTE_DIFFERENTIATION	0.862114	2.02621	4.12e-09	3.18e-09
GOBP_INTERLEUKIN_1_PRODUCTION	0.845887	2.0198	4.12e-09	3.18e-09
GOBP_REGULATION_OF_HEMOPOIESIS	0.776871	2.01963	4.12e-09	3.18e-09
GOBP_NATURAL_KILLER_CELL_ACTIVATION	0.870804	2.0191	4.12e-09	3.18e-09
GOBP_REGULATION_OF_ALPHA_BETA_T_CELL_ACTIVATION	0.861829	2.01889	4.12e-09	3.18e-09
GOBP_REGULATION_OF_LEUKOCYTE_MIGRATION	0.807745	2.01868	4.12e-09	3.18e-09
GOBP_T_CELL_RECEPTOR_SIGNALING_PATHWAY	0.847559	2.0153	4.12e-09	3.18e-09
GOBP_REGULATION_OF_PHAGOCYTOSIS	0.866479	2.01451	4.12e-09	3.18e-09
GOBP_MYELOID_CELL_ACTIVATION_INVOLVED_IN_IMMUNE_RESPONSE	0.868391	2.01351	6.39e-09	4.94e-09
GOBP_CELLULAR_RESPONSE_TO_BIOTIC_STIMULUS	0.79451	2.01145	4.12e-09	3.18e-09
GOBP_NEGATIVE_REGULATION_OF_IMMUNE_EFFECTOR_PROCESS	0.849814	2.01122	4.12e-09	3.18e-09
GOBP_REGULATION_OF_T_CELL_MEDIATED_IMMUNITY	0.87737	2.01096	1.04e-08	8.06e-09
GOBP_POSITIVE_REGULATION_OF_INTERFERON_GAMMA_PRODUCTION	0.887748	2.00295	4.25e-08	3.28e-08
GOBP_CD4_POSITIVE_ALPHA_BETA_T_CELL_DIFFERENTIATION	0.877276	2.00177	6.78e-09	5.24e-09
GOBP_ANTIGEN_PROCESSING_AND_PRESENTATION_OF_PEPTIDE_ANTIGEN	0.92339	1.99933	4.12e-09	3.18e-09
GOBP_NATURAL_KILLER_CELL_MEDIATED_IMMUNITY	0.886862	1.99927	1.99e-08	1.54e-08
GOBP_NEUTROPHIL_CHEMOTAXIS	0.854718	1.99681	2.7e-08	2.09e-08
GOBP_NEGATIVE_REGULATION_OF_LEUKOCYTE_CELL_CELL_ADHESION	0.830128	1.99679	4.12e-09	3.18e-09
GOBP_MACROPHAGE_ACTIVATION	0.853778	1.99597	8.36e-09	6.45e-09
GOBP_CD4_POSITIVE_ALPHA_BETA_T_CELL_ACTIVATION	0.856229	1.99552	2.54e-08	1.96e-08
GOBP_INTERLEUKIN_6_PRODUCTION	0.817262	1.99061	4.12e-09	3.18e-09
GOBP_POSITIVE_REGULATION_OF_INFLAMMATORY_RESPONSE	0.829155	1.98934	4.12e-09	3.18e-09
GOBP_RESPONSE_TO_VIRUS	0.760845	1.98909	4.12e-09	3.18e-09
GOBP_POSITIVE_REGULATION_OF_CELL_KILLING	0.905964	1.98582	1.42e-08	1.09e-08
GOBP_REGULATION_OF_LEUKOCYTE_CHEMOTAXIS	0.832913	1.98147	1.48e-08	1.14e-08
GOBP_GRANULOCYTE_CHEMOTAXIS	0.832037	1.9806	1.29e-08	9.96e-09
GOBP_POSITIVE_REGULATION_OF_ALPHA_BETA_T_CELL_ACTIVATION	0.890717	1.9787	8.16e-08	6.3e-08
GOBP_NEGATIVE_REGULATION_OF_CYTOKINE_PRODUCTION	0.760988	1.9763	4.12e-09	3.18e-09
GOBP_NEGATIVE_REGULATION_OF_LEUKOCYTE_MEDIATED_IMMUNITY	0.890953	1.97407	2.31e-07	1.78e-07
GOBP_POSITIVE_REGULATION_OF_TUMOR_NECROSIS_FACTOR_SUPERFAMILY_CYTOKINE_PRODUCTION	0.841047	1.97261	1.04e-07	8.02e-08
GOBP_POSITIVE_REGULATION_OF_RESPONSE_TO_BIOTIC_STIMULUS	0.804443	1.96966	4.12e-09	3.18e-09
GOBP_POSITIVE_REGULATION_OF_LEUKOCYTE_MIGRATION	0.820354	1.96769	1.54e-08	1.19e-08
GOBP_T_CELL_DIFFERENTIATION_INVOLVED_IN_IMMUNE_RESPONSE	0.872012	1.96744	4.01e-07	3.09e-07
GOBP_POSITIVE_REGULATION_OF_PHAGOCYTOSIS	0.882202	1.96728	1.92e-07	1.49e-07
GOBP_NEGATIVE_REGULATION_OF_LEUKOCYTE_PROLIFERATION	0.853357	1.96624	7.7e-07	5.94e-07
GOBP_MYELOID_LEUKOCYTE_MEDIATED_IMMUNITY	0.836306	1.96555	1.13e-07	8.7e-08
GOBP_REGULATION_OF_MONONUCLEAR_CELL_MIGRATION	0.828477	1.96072	1.08e-07	8.35e-08
GOBP_POSITIVE_REGULATION_OF_INNATE_IMMUNE_RESPONSE	0.819239	1.96006	2.89e-08	2.23e-08
GOBP_B_CELL_DIFFERENTIATION	0.814581	1.95939	1.21e-08	9.33e-09
GOBP_REGULATION_OF_ANTIGEN_RECEPTOR_MEDIATED_SIGNALING_PATHWAY	0.888287	1.9544	3.89e-07	3e-07
GOBP_INTERLEUKIN_12_PRODUCTION	0.891242	1.95355	1.34e-07	1.03e-07
GOBP_DEFENSE_RESPONSE_TO_SYMBIONT	0.765211	1.95289	4.12e-09	3.18e-09
GOBP_REGULATION_OF_LEUKOCYTE_APOPTOTIC_PROCESS	0.850941	1.95083	1.19e-06	9.17e-07
GOBP_MONOCYTE_CHEMOTAXIS	0.880442	1.95078	9.45e-07	7.3e-07
GOBP_LEUKOCYTE_DEGRANULATION	0.861431	1.94963	3.79e-07	2.93e-07
GOBP_NEGATIVE_REGULATION_OF_DEFENSE_RESPONSE	0.767552	1.94706	4.12e-09	3.18e-09
GOBP_REGULATION_OF_PRODUCTION_OF_MOLECULAR_MEDIATOR_OF_IMMUNE_RESPONSE	0.798403	1.94598	3.53e-08	2.72e-08
GOBP_LEUKOCYTE_APOPTOTIC_PROCESS	0.824471	1.94449	4.19e-07	3.23e-07
GOBP_REGULATION_OF_ALPHA_BETA_T_CELL_DIFFERENTIATION	0.87581	1.94051	1.52e-06	1.17e-06
GOBP_RESPONSE_TO_TUMOR_NECROSIS_FACTOR	0.771906	1.94004	4.12e-09	3.18e-09
GOBP_NEGATIVE_REGULATION_OF_CELL_CELL_ADHESION	0.78124	1.93564	5.23e-09	4.03e-09
GOBP_POSITIVE_REGULATION_OF_LEUKOCYTE_CHEMOTAXIS	0.83269	1.93129	2.44e-06	1.89e-06
GOBP_ACUTE_INFLAMMATORY_RESPONSE	0.815568	1.93017	8.38e-07	6.47e-07
GOBP_INTERLEUKIN_2_PRODUCTION	0.879715	1.92828	7.71e-07	5.96e-07
GOBP_INFLAMMATORY_RESPONSE_TO_ANTIGENIC_STIMULUS	0.857886	1.92638	3.31e-06	2.55e-06
GOBP_CYTOKINE_PRODUCTION_INVOLVED_IN_IMMUNE_RESPONSE	0.826032	1.92515	1.44e-06	1.11e-06
GOBP_POSITIVE_REGULATION_OF_ERK1_AND_ERK2_CASCADE	0.768924	1.92207	4.51e-09	3.48e-09
GOBP_REGULATION_OF_B_CELL_PROLIFERATION	0.872906	1.92056	2.33e-06	1.8e-06
GOBP_LYMPHOCYTE_CHEMOTAXIS	0.879926	1.91972	2.38e-06	1.84e-06
GOBP_ANTIGEN_PROCESSING_AND_PRESENTATION_OF_EXOGENOUS_ANTIGEN	0.926591	1.9172	4.23e-07	3.27e-07
GOBP_NEGATIVE_REGULATION_OF_TUMOR_NECROSIS_FACTOR_SUPERFAMILY_CYTOKINE_PRODUCTION	0.849645	1.91698	5.26e-06	4.06e-06
GOBP_NEGATIVE_REGULATION_OF_LYMPHOCYTE_MEDIATED_IMMUNITY	0.891399	1.91642	1.51e-06	1.16e-06
GOBP_NEGATIVE_REGULATION_OF_INTERLEUKIN_6_PRODUCTION	0.864581	1.91563	5.25e-06	4.06e-06
GOBP_REGULATION_OF_CYTOSOLIC_CALCIUM_ION_CONCENTRATION	0.735682	1.91026	4.12e-09	3.18e-09
GOBP_NEGATIVE_REGULATION_OF_INNATE_IMMUNE_RESPONSE	0.852184	1.90857	4.97e-06	3.83e-06
GOBP_CELLULAR_RESPONSE_TO_INTERLEUKIN_1	0.809033	1.90808	2.66e-06	2.05e-06
GOBP_POSITIVE_REGULATION_OF_CHEMOTAXIS	0.794939	1.90673	4.79e-07	3.69e-07
GOBP_REGULATION_OF_CHEMOTAXIS	0.762092	1.90467	1.48e-08	1.14e-08
GOBP_TOLL_LIKE_RECEPTOR_SIGNALING_PATHWAY	0.800515	1.90344	1.04e-06	8.03e-07
GOBP_POSITIVE_REGULATION_OF_INTERLEUKIN_1_PRODUCTION	0.85411	1.90321	7.95e-06	6.14e-06
GOBP_T_CELL_SELECTION	0.91064	1.90215	8.27e-07	6.38e-07
GOBP_INTERLEUKIN_8_PRODUCTION	0.810885	1.89955	4.04e-06	3.12e-06
GOBP_T_CELL_MIGRATION	0.858904	1.89642	1.03e-05	7.96e-06
GOBP_CALCIUM_MEDIATED_SIGNALING	0.762209	1.89277	1.1e-07	8.5e-08
GOBP_CELLULAR_DEFENSE_RESPONSE	0.892901	1.8925	1.07e-06	8.26e-07
GOBP_NEGATIVE_REGULATION_OF_RESPONSE_TO_BIOTIC_STIMULUS	0.801274	1.89143	1.25e-05	9.68e-06
GOBP_IMMUNOGLOBULIN_PRODUCTION_INVOLVED_IN_IMMUNOGLOBULIN_MEDIATED_IMMUNE_RESPONSE	0.856392	1.89087	1.25e-05	9.68e-06
GOBP_POSITIVE_REGULATION_OF_INTERLEUKIN_1_BETA_PRODUCTION	0.871697	1.8874	1.05e-05	8.09e-06
GOBP_T_CELL_MEDIATED_CYTOTOXICITY	0.902288	1.88725	3.33e-06	2.57e-06
GOBP_NEGATIVE_REGULATION_OF_ADAPTIVE_IMMUNE_RESPONSE	0.871166	1.88625	1.06e-05	8.18e-06
GOBP_PRODUCTION_OF_MOLECULAR_MEDIATOR_INVOLVED_IN_INFLAMMATORY_RESPONSE	0.810655	1.88496	9.57e-06	7.39e-06
GOBP_PATTERN_RECOGNITION_RECEPTOR_SIGNALING_PATHWAY	0.768481	1.88339	6.09e-07	4.7e-07
GOBP_ANTIGEN_PROCESSING_AND_PRESENTATION_OF_EXOGENOUS_PEPTIDE_ANTIGEN	0.941015	1.88274	1.15e-06	8.87e-07
GOBP_INTERLEUKIN_10_PRODUCTION	0.869727	1.88264	2.29e-06	1.76e-06
GOBP_POSITIVE_REGULATION_OF_T_CELL_MEDIATED_IMMUNITY	0.873249	1.88029	2.16e-05	1.67e-05
GOBP_POSITIVE_REGULATION_OF_MONONUCLEAR_CELL_MIGRATION	0.849824	1.87637	2.51e-05	1.94e-05
GOBP_POSITIVE_REGULATION_OF_PRODUCTION_OF_MOLECULAR_MEDIATOR_OF_IMMUNE_RESPONSE	0.791293	1.87331	4.36e-06	3.37e-06
GOBP_REGULATION_OF_CD4_POSITIVE_ALPHA_BETA_T_CELL_ACTIVATION	0.851415	1.87328	2.16e-05	1.67e-05
GOBP_REGULATION_OF_NATURAL_KILLER_CELL_MEDIATED_IMMUNITY	0.893914	1.86721	1.03e-05	7.96e-06
GOBP_REGULATION_OF_CD4_POSITIVE_ALPHA_BETA_T_CELL_DIFFERENTIATION	0.889536	1.86379	1.24e-05	9.58e-06
GOBP_NEGATIVE_REGULATION_OF_VIRAL_PROCESS	0.807765	1.86119	0.000109616	8.46e-05
GOBP_POSITIVE_REGULATION_OF_ALPHA_BETA_T_CELL_DIFFERENTIATION	0.888272	1.86114	1.53e-05	1.18e-05
GOBP_NEGATIVE_REGULATION_OF_INFLAMMATORY_RESPONSE	0.757688	1.85764	6.35e-07	4.9e-07
GOBP_NEGATIVE_REGULATION_OF_CELL_ADHESION	0.721819	1.85336	1.75e-08	1.35e-08
GOBP_CELLULAR_EXTRAVASATION	0.827377	1.85302	9.04e-05	6.98e-05
GOBP_RESPONSE_TO_INTERLEUKIN_1	0.772211	1.8526	5.07e-06	3.92e-06
GOBP_GRANULOCYTE_ACTIVATION	0.890167	1.85182	5.16e-05	3.98e-05
GOBP_DENDRITIC_CELL_DIFFERENTIATION	0.886118	1.85093	2.91e-05	2.24e-05
GOBP_MYELOID_LEUKOCYTE_DIFFERENTIATION	0.740194	1.84823	7.59e-07	5.86e-07
GOBP_POSITIVE_REGULATION_OF_INTERLEUKIN_6_PRODUCTION	0.794286	1.84771	7.18e-05	5.54e-05
GOBP_POSITIVE_T_CELL_SELECTION	0.922905	1.84651	2.28e-05	1.76e-05
GOBP_NEGATIVE_REGULATION_OF_T_CELL_PROLIFERATION	0.835438	1.84461	9.47e-05	7.31e-05
GOBP_NEGATIVE_REGULATION_OF_HEMOPOIESIS	0.786094	1.84373	7.97e-05	6.15e-05
GOBP_LYMPHOCYTE_APOPTOTIC_PROCESS	0.817163	1.84215	0.000180024	0.000138997
GOBP_LYMPHOCYTE_HOMEOSTASIS	0.834286	1.84206	0.000102813	7.94e-05
GOBP_POSITIVE_REGULATION_OF_CHEMOKINE_PRODUCTION	0.826536	1.84192	0.000118774	9.17e-05
GOBP_LYMPHOCYTE_COSTIMULATION	0.882015	1.83883	6.8e-05	5.25e-05
GOBP_LEUKOCYTE_HOMEOSTASIS	0.796898	1.83844	6.22e-05	4.8e-05
GOBP_NEGATIVE_REGULATION_OF_RESPONSE_TO_EXTERNAL_STIMULUS	0.702484	1.83773	4.12e-09	3.18e-09
GOBP_DEFENSE_RESPONSE_TO_GRAM_POSITIVE_BACTERIUM	0.790136	1.83701	7.5e-05	5.79e-05
GOBP_REGULATION_OF_T_CELL_MEDIATED_CYTOTOXICITY	0.909167	1.83357	1.82e-05	1.41e-05
GOBP_MAST_CELL_ACTIVATION	0.826831	1.83199	0.00023235	0.000179399
GOBP_RESPONSE_TO_FUNGUS	0.832156	1.83091	0.000142441	0.00010998
GOBP_NIK_NF_KAPPAB_SIGNALING	0.758665	1.82908	2.65e-05	2.05e-05
GOBP_REGULATION_OF_LYMPHOCYTE_APOPTOTIC_PROCESS	0.850005	1.82885	8.49e-05	6.56e-05
GOBP_B_CELL_ACTIVATION_INVOLVED_IN_IMMUNE_RESPONSE	0.803302	1.82874	0.00018405	0.000142106
GOBP_CHEMOKINE_PRODUCTION	0.784657	1.82652	0.000103082	7.96e-05
GOBP_ERK1_AND_ERK2_CASCADE	0.706364	1.82546	2.8e-08	2.17e-08
GOBP_POSITIVE_REGULATION_OF_INTERLEUKIN_12_PRODUCTION	0.895424	1.82535	0.000104316	8.05e-05
GOBP_POSITIVE_REGULATION_OF_CYTOKINE_PRODUCTION_INVOLVED_IN_IMMUNE_RESPONSE	0.82147	1.82487	0.000184057	0.000142112
GOBP_LEUKOCYTE_ADHESION_TO_VASCULAR_ENDOTHELIAL_CELL	0.847277	1.82437	0.000217172	0.00016768
GOBP_ANTIGEN_PROCESSING_AND_PRESENTATION_OF_PEPTIDE_OR_POLYSACCHARIDE_ANTIGEN_VIA_MHC_CLASS_II	0.932729	1.82308	1.25e-05	9.68e-06
GOBP_T_HELPER_1_TYPE_IMMUNE_RESPONSE	0.879361	1.81947	0.00018371	0.000141843
GOBP_T_CELL_DIFFERENTIATION_IN_THYMUS	0.80335	1.81818	0.000158765	0.000122583
GOBP_REGULATION_OF_NIK_NF_KAPPAB_SIGNALING	0.767418	1.81582	0.00018172	0.000140307
GOBP_POSITIVE_REGULATION_OF_CD4_POSITIVE_ALPHA_BETA_T_CELL_ACTIVATION	0.899852	1.81478	6.25e-05	4.82e-05
GOBP_ANTIGEN_PROCESSING_AND_PRESENTATION_OF_EXOGENOUS_PEPTIDE_ANTIGEN_VIA_MHC_CLASS_II	0.939962	1.81382	2.03e-05	1.57e-05
GOBP_REGULATION_OF_LYMPHOCYTE_MIGRATION	0.837925	1.8138	7.3e-05	5.64e-05
GOBP_ANTIGEN_PROCESSING_AND_PRESENTATION_OF_ENDOGENOUS_ANTIGEN	0.940978	1.81365	0.000136719	0.000105562
GOBP_REGULATION_OF_MYELOID_LEUKOCYTE_DIFFERENTIATION	0.76489	1.81254	7.69e-05	5.93e-05
GOBP_REGULATION_OF_MYELOID_LEUKOCYTE_MEDIATED_IMMUNITY	0.836757	1.81175	0.00028191	0.000217664
GOBP_RECEPTOR_SIGNALING_PATHWAY_VIA_STAT	0.73593	1.81125	2.11e-05	1.63e-05
GOBP_REGULATION_OF_CALCIUM_MEDIATED_SIGNALING	0.806268	1.81047	0.000400578	0.000309288
GOBP_LIPOPOLYSACCHARIDE_MEDIATED_SIGNALING_PATHWAY	0.83452	1.80643	0.000104316	8.05e-05
GOBP_NEGATIVE_REGULATION_OF_LEUKOCYTE_APOPTOTIC_PROCESS	0.864672	1.80613	0.00018405	0.000142106
GOBP_REGULATION_OF_RESPONSE_TO_CYTOKINE_STIMULUS	0.737493	1.80573	1.8e-05	1.39e-05
GOBP_POSITIVE_REGULATION_OF_INTERLEUKIN_8_PRODUCTION	0.827051	1.80436	0.000315987	0.000243975
GOBP_DENDRITIC_CELL_MIGRATION	0.916287	1.80383	5.93e-05	4.58e-05
GOBP_POSITIVE_REGULATION_OF_PEPTIDYL_TYROSINE_PHOSPHORYLATION	0.730506	1.80207	1.1e-05	8.52e-06
GOBP_REGULATION_OF_T_CELL_RECEPTOR_SIGNALING_PATHWAY	0.879378	1.79966	0.000151374	0.000116876
GOBP_REGULATORY_T_CELL_DIFFERENTIATION	0.905759	1.79733	0.000172591	0.000133259
GOBP_SUPEROXIDE_METABOLIC_PROCESS	0.805724	1.79539	0.000424773	0.00032797
GOBP_CD8_POSITIVE_ALPHA_BETA_T_CELL_ACTIVATION	0.931056	1.79452	0.000351597	0.00027147
GOBP_ANTIMICROBIAL_HUMORAL_RESPONSE	0.759257	1.79367	0.000197559	0.000152536
GOBP_REGULATION_OF_VIRAL_PROCESS	0.737472	1.79322	7.25e-05	5.6e-05
GOBP_NEGATIVE_REGULATION_OF_T_CELL_MEDIATED_IMMUNITY	0.927603	1.79305	0.000116598	9e-05
GOBP_MICROGLIAL_CELL_ACTIVATION	0.865507	1.79081	0.00052388	0.00040449
GOBP_DENDRITIC_CELL_CHEMOTAXIS	0.928602	1.78979	0.000419288	0.000323734
GOBP_POSITIVE_REGULATION_OF_CD4_POSITIVE_ALPHA_BETA_T_CELL_DIFFERENTIATION	0.915679	1.78975	0.000101505	7.84e-05
GOBP_MATURE_B_CELL_DIFFERENTIATION	0.904426	1.7886	0.000151374	0.000116876
GOBP_REGULATION_OF_LEUKOCYTE_DEGRANULATION	0.854527	1.78735	0.000429211	0.000331396
GOBP_NEGATIVE_REGULATION_OF_VIRAL_GENOME_REPLICATION	0.836218	1.78702	0.000405416	0.000313024
GOBP_REGULATION_OF_B_CELL_MEDIATED_IMMUNITY	0.83048	1.78545	0.000715897	0.000552748
GOBP_REGULATION_OF_T_HELPER_CELL_DIFFERENTIATION	0.885263	1.78536	0.000196959	0.000152073
GOBP_REGULATION_OF_IMMUNOGLOBULIN_PRODUCTION	0.803465	1.78487	0.000676116	0.000522033
GOBP_T_CELL_CYTOKINE_PRODUCTION	0.884729	1.78428	0.000204329	0.000157763
GOBP_CALCIUM_ION_TRANSPORT_INTO_CYTOSOL	0.731561	1.78307	0.000115548	8.92e-05
GOBP_DIVALENT_INORGANIC_CATION_HOMEOSTASIS	0.676235	1.78135	4.12e-09	3.18e-09
GOBP_REGULATION_OF_NATURAL_KILLER_CELL_ACTIVATION	0.882753	1.78029	0.000239322	0.000184782
GOBP_REGULATION_OF_PEPTIDYL_TYROSINE_PHOSPHORYLATION	0.701535	1.77856	4.55e-06	3.51e-06
GOBP_ANTIGEN_PROCESSING_AND_PRESENTATION_OF_PEPTIDE_ANTIGEN_VIA_MHC_CLASS_I	0.91913	1.77848	0.000223769	0.000172773
GOBP_RESPIRATORY_BURST	0.899168	1.77821	0.000227829	0.000175908
GOBP_POSITIVE_REGULATION_OF_LYMPHOCYTE_MIGRATION	0.887479	1.77563	0.000716308	0.000553065
GOBP_REGULATION_OF_NEUTROPHIL_MIGRATION	0.857814	1.77489	0.00085952	0.00066364
GOBP_PHOSPHOLIPASE_C_ACTIVATING_G_PROTEIN_COUPLED_RECEPTOR_SIGNALING_PATHWAY	0.757494	1.77448	0.000464183	0.000358398
GOBP_REGULATION_OF_MACROPHAGE_ACTIVATION	0.823503	1.77441	0.000584623	0.00045139
GOBP_NEGATIVE_REGULATION_OF_INTERLEUKIN_1_PRODUCTION	0.839867	1.77369	0.000681141	0.000525913
GOBP_NEGATIVE_REGULATION_OF_CELL_KILLING	0.918856	1.77309	0.000238075	0.000183819
GOBP_NEGATIVE_REGULATION_OF_INTERFERON_GAMMA_PRODUCTION	0.877072	1.77171	0.00037636	0.000290589
GOBP_PLATELET_ACTIVATION	0.736478	1.77104	0.000877198	0.000677289
GOBP_TOLERANCE_INDUCTION	0.914853	1.77021	0.000384766	0.00029708
GOBP_SECOND_MESSENGER_MEDIATED_SIGNALING	0.689147	1.76653	2.67e-06	2.06e-06
GOBP_SEQUESTERING_OF_CALCIUM_ION	0.739366	1.76545	0.00036975	0.000285486
GOBP_REGULATION_OF_T_HELPER_1_TYPE_IMMUNE_RESPONSE	0.911752	1.76421	0.000512586	0.00039577
GOBP_NEGATIVE_REGULATION_OF_B_CELL_ACTIVATION	0.888962	1.764	0.000715897	0.000552748
GOBP_PEPTIDYL_TYROSINE_MODIFICATION	0.676457	1.76353	4.01e-07	3.09e-07
GOBP_MAST_CELL_ACTIVATION_INVOLVED_IN_IMMUNE_RESPONSE	0.824282	1.76151	0.000749634	0.000578796
GOBP_CYTOKINE_PRODUCTION_INVOLVED_IN_INFLAMMATORY_RESPONSE	0.786226	1.76085	0.00149514	0.0011544
GOBP_POSITIVE_REGULATION_OF_INTERLEUKIN_10_PRODUCTION	0.871549	1.76055	0.000599374	0.00046278
GOBP_SUPEROXIDE_ANION_GENERATION	0.863394	1.76005	0.00145639	0.00112449
GOBP_POSITIVE_REGULATION_OF_NATURAL_KILLER_CELL_MEDIATED_IMMUNITY	0.899876	1.75937	0.000453355	0.000350038
GOBP_TYPE_I_INTERFERON_PRODUCTION	0.758178	1.75847	0.00166893	0.00128859
GOBP_INTERLEUKIN_17_PRODUCTION	0.855072	1.75824	0.000443822	0.000342677
GOBP_PEPTIDE_ANTIGEN_ASSEMBLY_WITH_MHC_PROTEIN_COMPLEX	0.980267	1.75807	2.74e-06	2.12e-06
GOBP_T_CELL_APOPTOTIC_PROCESS	0.838967	1.75784	0.000894166	0.000690391
GOBP_NEGATIVE_REGULATION_OF_LYMPHOCYTE_DIFFERENTIATION	0.820808	1.75409	0.000894797	0.000690878
GOBP_REGULATION_OF_CALCIUM_ION_TRANSPORT	0.696485	1.75389	2.67e-05	2.06e-05
GOBP_T_HELPER_17_TYPE_IMMUNE_RESPONSE	0.868054	1.75349	0.000735758	0.000568082
GOBP_REGULATION_OF_INFLAMMATORY_RESPONSE_TO_ANTIGENIC_STIMULUS	0.856391	1.75262	0.000852208	0.000657994
GOBP_CELLULAR_RESPONSE_TO_VIRUS	0.770696	1.75096	0.00190275	0.00146912
GOBP_REGULATION_OF_T_CELL_APOPTOTIC_PROCESS	0.885355	1.75089	0.00070709	0.000545948
GOBP_TUMOR_NECROSIS_FACTOR_MEDIATED_SIGNALING_PATHWAY	0.748767	1.75048	0.000734316	0.00056697
GOBP_THYMIC_T_CELL_SELECTION	0.933252	1.74927	0.000569726	0.000439889
GOBP_MACROPHAGE_MIGRATION	0.824556	1.74875	0.00189795	0.00146542
GOBP_DEFENSE_RESPONSE_TO_FUNGUS	0.824443	1.74851	0.00192151	0.00148361
GOBP_APOPTOTIC_CELL_CLEARANCE	0.82789	1.7484	0.00134814	0.0010409
GOBP_ACUTE_INFLAMMATORY_RESPONSE_TO_ANTIGENIC_STIMULUS	0.918748	1.74653	0.00118065	0.000911587
GOBP_ALPHA_BETA_T_CELL_PROLIFERATION	0.861952	1.74473	0.0012264	0.000946911
GOBP_NATURAL_KILLER_CELL_ACTIVATION_INVOLVED_IN_IMMUNE_RESPONSE	0.886146	1.74449	0.000685822	0.000529527
GOBP_NEGATIVE_REGULATION_OF_INTERLEUKIN_2_PRODUCTION	0.902863	1.74223	0.000933837	0.00072102
GOBP_CELL_ADHESION_MEDIATED_BY_INTEGRIN	0.763026	1.74108	0.00147891	0.00114188
GOBP_CYTOLYSIS	0.915867	1.74105	0.00134899	0.00104156
GOBP_POSITIVE_REGULATION_OF_ALPHA_BETA_T_CELL_PROLIFERATION	0.920066	1.74103	0.00110158	0.000850537
GOBP_POSITIVE_REGULATION_OF_T_CELL_MEDIATED_CYTOTOXICITY	0.902061	1.74068	0.000983918	0.000759689
GOBP_POSITIVE_REGULATION_OF_NIK_NF_KAPPAB_SIGNALING	0.788164	1.74045	0.00459421	0.00354722
GOBP_I_KAPPAB_KINASE_NF_KAPPAB_SIGNALING	0.680483	1.7391	9.24e-06	7.13e-06
GOBP_CALCIUM_ION_TRANSPORT	0.666332	1.73884	2.56e-07	1.98e-07
GOBP_REGULATION_OF_B_CELL_DIFFERENTIATION	0.889307	1.73871	0.000983918	0.000759689
GOBP_MYELOID_CELL_DIFFERENTIATION	0.666574	1.73789	1.64e-06	1.26e-06
GOBP_TYROSINE_PHOSPHORYLATION_OF_STAT_PROTEIN	0.754238	1.73748	0.00296176	0.00228679
GOBP_NEGATIVE_REGULATION_OF_T_CELL_DIFFERENTIATION	0.839606	1.73722	0.00302544	0.00233596
GOBP_NEGATIVE_REGULATION_OF_ANTIGEN_RECEPTOR_MEDIATED_SIGNALING_PATHWAY	0.881815	1.73597	0.000885263	0.000683516
GOBP_POSITIVE_REGULATION_OF_MAPK_CASCADE	0.658533	1.73565	9.96e-08	7.69e-08
GOBP_DEFENSE_RESPONSE_TO_GRAM_NEGATIVE_BACTERIUM	0.752213	1.73282	0.00323968	0.00250138
GOBP_REGULATION_OF_B_CELL_RECEPTOR_SIGNALING_PATHWAY	0.915581	1.73254	0.0015177	0.00117183
GOBP_RESPONSE_TO_TUMOR_CELL	0.858953	1.73229	0.00147109	0.00113584
GOBP_TYPE_2_IMMUNE_RESPONSE	0.863186	1.7319	0.00230301	0.00177817
GOBP_REGULATION_OF_VIRAL_ENTRY_INTO_HOST_CELL	0.849407	1.73154	0.00296176	0.00228679
GOBP_INTERLEUKIN_4_PRODUCTION	0.879548	1.73151	0.00111375	0.000859929
GOBP_ACTIVATED_T_CELL_PROLIFERATION	0.825979	1.73063	0.00181926	0.00140466
GOBP_NEGATIVE_REGULATION_OF_PRODUCTION_OF_MOLECULAR_MEDIATOR_OF_IMMUNE_RESPONSE	0.85779	1.72995	0.00165488	0.00127774
GOBP_REGULATION_OF_LEUKOCYTE_ADHESION_TO_VASCULAR_ENDOTHELIAL_CELL	0.854106	1.72885	0.00193615	0.00149491
GOBP_ANTIFUNGAL_INNATE_IMMUNE_RESPONSE	0.936031	1.72878	0.000776104	0.000599234
GOBP_REGULATION_OF_ANTIGEN_PROCESSING_AND_PRESENTATION	0.94747	1.72556	0.000432861	0.000334215
GOBP_REGULATION_OF_GRANULOCYTE_CHEMOTAXIS	0.823538	1.72551	0.0019882	0.0015351
GOBP_NEGATIVE_REGULATION_OF_NF_KAPPAB_TRANSCRIPTION_FACTOR_ACTIVITY	0.744328	1.72486	0.00378272	0.00292066
GOBP_POSITIVE_REGULATION_OF_NATURAL_KILLER_CELL_MEDIATED_CYTOTOXICITY	0.894801	1.72465	0.00505128	0.00390012
GOBP_POSITIVE_REGULATION_OF_NATURAL_KILLER_CELL_ACTIVATION	0.902579	1.72392	0.00250337	0.00193287
GOBP_REGULATION_OF_OSTEOCLAST_DIFFERENTIATION	0.786266	1.72345	0.00311383	0.0024042
GOBP_REGULATION_OF_HUMORAL_IMMUNE_RESPONSE	0.832233	1.72196	0.00444359	0.00343092
GOBP_POSITIVE_REGULATION_OF_RESPONSE_TO_CYTOKINE_STIMULUS	0.795428	1.72181	0.00146012	0.00112736
GOBP_REGULATION_OF_TOLL_LIKE_RECEPTOR_SIGNALING_PATHWAY	0.765631	1.72133	0.00654376	0.00505247
GOBP_RESPONSE_TO_PROTOZOAN	0.890227	1.72081	0.00212945	0.00164416
GOBP_HEMOSTASIS	0.686944	1.71984	9.93e-05	7.67e-05
GOBP_POSITIVE_REGULATION_OF_T_CELL_MIGRATION	0.888391	1.7192	0.00190821	0.00147334
GOBP_CYTOSOLIC_CALCIUM_ION_TRANSPORT	0.7002	1.71884	0.000258372	0.00019949
GOBP_POSITIVE_REGULATION_OF_INTERLEUKIN_4_PRODUCTION	0.899529	1.7181	0.00313525	0.00242075
GOBP_NEGATIVE_REGULATION_OF_CYTOKINE_PRODUCTION_INVOLVED_IN_IMMUNE_RESPONSE	0.888408	1.71729	0.00232781	0.00179732
GOBP_POSITIVE_REGULATION_OF_MYELOID_LEUKOCYTE_DIFFERENTIATION	0.798606	1.71693	0.00372575	0.00287667
GOBP_POSITIVE_REGULATION_OF_INTERLEUKIN_2_PRODUCTION	0.867217	1.71502	0.00207763	0.00160415
GOBP_REGULATION_OF_LYMPHOCYTE_CHEMOTAXIS	0.889345	1.71413	0.0065197	0.0050339
GOBP_REGULATION_OF_T_CELL_MIGRATION	0.840291	1.71295	0.00451344	0.00348485
GOBP_POSITIVE_REGULATION_OF_ANTIGEN_RECEPTOR_MEDIATED_SIGNALING_PATHWAY	0.901041	1.71287	0.00349174	0.00269599
GOBP_POSITIVE_REGULATION_OF_B_CELL_PROLIFERATION	0.840131	1.71263	0.00451344	0.00348485
GOBP_POSITIVE_REGULATION_OF_CALCIUM_ION_TRANSPORT	0.72259	1.7123	0.00115013	0.000888018
GOBP_POSITIVE_REGULATION_OF_T_CELL_CYTOKINE_PRODUCTION	0.886736	1.7091	0.00756549	0.00584135
GOBP_REGULATION_OF_T_HELPER_17_TYPE_IMMUNE_RESPONSE	0.886165	1.708	0.00785487	0.00606479
GOBP_PEPTIDE_ANTIGEN_ASSEMBLY_WITH_MHC_CLASS_II_PROTEIN_COMPLEX	0.989618	1.70493	3.69e-06	2.85e-06
GOBP_CD4_POSITIVE_OR_CD8_POSITIVE_ALPHA_BETA_T_CELL_LINEAGE_COMMITMENT	0.909315	1.7044	0.00367109	0.00283447
GOBP_POSITIVE_REGULATION_OF_TYROSINE_PHOSPHORYLATION_OF_STAT_PROTEIN	0.767153	1.70421	0.00542481	0.00418852
GOBP_POSITIVE_REGULATION_OF_B_CELL_MEDIATED_IMMUNITY	0.861521	1.70375	0.00312897	0.00241589
GOBP_POSITIVE_REGULATION_OF_INTERLEUKIN_17_PRODUCTION	0.896044	1.70337	0.0045284	0.0034964
GOBP_REGULATION_OF_MACROPHAGE_MIGRATION	0.842907	1.70269	0.00447497	0.00345515
GOBP_NEGATIVE_REGULATION_OF_LEUKOCYTE_MIGRATION	0.813498	1.70153	0.00447497	0.00345515
GOBP_ANTIGEN_PROCESSING_AND_PRESENTATION_OF_ENDOGENOUS_PEPTIDE_ANTIGEN	0.941938	1.70029	0.00182739	0.00141094
GOBP_DETECTION_OF_EXTERNAL_BIOTIC_STIMULUS	0.890201	1.70028	0.00489681	0.00378085
GOBP_PYROPTOSIS	0.919838	1.69888	0.00255428	0.00197217
GOBP_POSITIVE_REGULATION_OF_CYTOSOLIC_CALCIUM_ION_CONCENTRATION_INVOLVED_IN_PHOSPHOLIPASE_C_ACTIVATING_G_PROTEIN_COUPLED_SIGNALING_PATHWAY	0.868515	1.69806	0.00384754	0.00297071
GOBP_MACROPHAGE_DIFFERENTIATION	0.812884	1.69796	0.00593654	0.00458364
GOBP_LEUKOCYTE_TETHERING_OR_ROLLING	0.862502	1.69795	0.00323074	0.00249447
GOBP_NEUTROPHIL_ACTIVATION_INVOLVED_IN_IMMUNE_RESPONSE	0.919217	1.69773	0.00265317	0.00204853
GOBP_EOSINOPHIL_MIGRATION	0.905694	1.69762	0.00470261	0.00363091
GOBP_NEGATIVE_REGULATION_OF_INTERLEUKIN_1_BETA_PRODUCTION	0.824821	1.69604	0.00326131	0.00251808
GOBP_REGULATION_OF_PATTERN_RECOGNITION_RECEPTOR_SIGNALING_PATHWAY	0.727626	1.6958	0.00444593	0.00343273
GOBP_T_CELL_CHEMOTAXIS	0.877977	1.69421	0.00464893	0.00358946
GOBP_POSITIVE_REGULATION_OF_LEUKOCYTE_APOPTOTIC_PROCESS	0.876365	1.69401	0.00382259	0.00295144
GOBP_CHRONIC_INFLAMMATORY_RESPONSE	0.94645	1.69344	0.00237322	0.00183238
GOBP_POSITIVE_REGULATION_OF_CALCIUM_MEDIATED_SIGNALING	0.859882	1.69279	0.00384754	0.00297071
GOBP_INNATE_IMMUNE_RESPONSE_ACTIVATING_SIGNAL_TRANSDUCTION	0.874968	1.69131	0.00419398	0.00323819
GOBP_COMPLEMENT_ACTIVATION_ALTERNATIVE_PATHWAY	0.942919	1.69109	0.000692819	0.000534929
GOBP_REGULATION_OF_PLATELET_ACTIVATION	0.80842	1.69091	0.00601094	0.00464108
GOBP_POSITIVE_REGULATION_OF_IMMUNOGLOBULIN_PRODUCTION	0.812294	1.68982	0.00914874	0.00706379
GOBP_MYELOID_DENDRITIC_CELL_ACTIVATION	0.87326	1.68973	0.00608781	0.00470043
GOBP_POSITIVE_REGULATION_OF_I_KAPPAB_KINASE_NF_KAPPAB_SIGNALING	0.686145	1.68936	0.000552644	0.000426699
GOBP_NEGATIVE_REGULATION_OF_NATURAL_KILLER_CELL_MEDIATED_IMMUNITY	0.926663	1.68767	0.00259978	0.00200731
GOBP_POSITIVE_REGULATION_OF_NITRIC_OXIDE_SYNTHASE_BIOSYNTHETIC_PROCESS	0.942139	1.68573	0.00313525	0.00242075
GOBP_T_CELL_LINEAGE_COMMITMENT	0.873561	1.68569	0.00604931	0.00467071
GOBP_NEUROINFLAMMATORY_RESPONSE	0.823611	1.68554	0.00447497	0.00345515
GOBP_MACROPHAGE_CHEMOTAXIS	0.839448	1.68427	0.00746487	0.00576367
GOBP_OSTEOCLAST_DIFFERENTIATION	0.723621	1.68333	0.00484025	0.00373719
GOBP_REGULATION_OF_DEFENSE_RESPONSE_TO_VIRUS	0.758859	1.68139	0.0123195	0.00951196
GOBP_VIRAL_LIFE_CYCLE	0.652208	1.68088	0.000106041	8.19e-05
GOBP_T_HELPER_17_CELL_DIFFERENTIATION	0.870983	1.68071	0.00669886	0.00517223
GOBP_REGULATED_EXOCYTOSIS	0.670136	1.68025	0.000299465	0.000231219
GOBP_POSITIVE_REGULATION_OF_NF_KAPPAB_TRANSCRIPTION_FACTOR_ACTIVITY	0.690772	1.67966	0.00165357	0.00127673
GOBP_NEGATIVE_REGULATION_OF_T_CELL_RECEPTOR_SIGNALING_PATHWAY	0.879225	1.67932	0.00912616	0.00704636
GOBP_POSITIVE_REGULATION_OF_ACUTE_INFLAMMATORY_RESPONSE	0.868561	1.67893	0.00617108	0.00476473
GOBP_REGULATION_OF_ACUTE_INFLAMMATORY_RESPONSE	0.80694	1.67868	0.0107453	0.00829647
GOBP_ACTIVATION_OF_INNATE_IMMUNE_RESPONSE	0.785397	1.67841	0.00525753	0.00405937
GOBP_POSITIVE_REGULATION_OF_NEUTROPHIL_MIGRATION	0.858432	1.67835	0.00617108	0.00476473
GOBP_KILLING_OF_CELLS_OF_ANOTHER_ORGANISM	0.815923	1.67774	0.00505128	0.00390012
GOBP_MODULATION_OF_PROCESS_OF_ANOTHER_ORGANISM	0.876935	1.67494	0.00954398	0.00736896
GOBP_REGULATION_OF_MYELOID_CELL_DIFFERENTIATION	0.677086	1.67488	0.000853202	0.000658762
GOBP_REGULATION_OF_MACROPHAGE_CHEMOTAXIS	0.865795	1.67358	0.00694706	0.00536386
GOBP_REGULATION_OF_PHOSPHATIDYLINOSITOL_3_KINASE_ACTIVITY	0.78271	1.67267	0.00569728	0.0043989
GOBP_NITRIC_OXIDE_SYNTHASE_BIOSYNTHETIC_PROCESS	0.918384	1.67259	0.00459834	0.0035504
GOBP_IMMUNOLOGICAL_SYNAPSE_FORMATION	0.95542	1.66953	0.00232184	0.00179271
GOBP_REGULATION_OF_MAST_CELL_ACTIVATION	0.815776	1.6695	0.00635837	0.00490933
GOBP_TOLL_LIKE_RECEPTOR_4_SIGNALING_PATHWAY	0.814562	1.66702	0.00680429	0.00525363
GOBP_REGULATION_OF_DEFENSE_RESPONSE_TO_VIRUS_BY_HOST	0.826568	1.66698	0.00889949	0.00687134
GOBP_REGULATION_OF_RECEPTOR_SIGNALING_PATHWAY_VIA_STAT	0.703376	1.66677	0.00317578	0.00245204
GOBP_POSITIVE_REGULATION_OF_GTPASE_ACTIVITY	0.654175	1.66498	0.000404367	0.000312214
GOBP_REGULATION_OF_NEUTROPHIL_CHEMOTAXIS	0.849882	1.66115	0.00909199	0.00701998
GOBP_NEGATIVE_REGULATION_OF_REGULATED_SECRETORY_PATHWAY	0.87762	1.66071	0.0136657	0.0105514
GOBP_MYD88_DEPENDENT_TOLL_LIKE_RECEPTOR_SIGNALING_PATHWAY	0.873537	1.66058	0.0125343	0.00967776
GOBP_MAINTENANCE_OF_LOCATION_IN_CELL	0.663589	1.65876	0.000577444	0.000445847
GOBP_ENTRY_INTO_HOST	0.684	1.65869	0.00182739	0.00141094
GOBP_ANTIBACTERIAL_HUMORAL_RESPONSE	0.785374	1.65861	0.0103087	0.00795938
GOBP_POSITIVE_REGULATION_OF_MACROPHAGE_MIGRATION	0.868353	1.65855	0.0136113	0.0105094
GOBP_REGULATION_OF_CYSTEINE_TYPE_ENDOPEPTIDASE_ACTIVITY	0.661211	1.65714	0.000580071	0.000447876
GOBP_NEGATIVE_REGULATION_OF_RESPONSE_TO_CYTOKINE_STIMULUS	0.719171	1.65706	0.0153758	0.0118717
GOBP_POSITIVE_REGULATION_OF_TYPE_I_INTERFERON_PRODUCTION	0.770692	1.65691	0.0143253	0.0110606
GOBP_POSITIVE_THYMIC_T_CELL_SELECTION	0.961698	1.65683	0.00145639	0.00112449
GOBP_NEGATIVE_REGULATION_OF_INTERLEUKIN_12_PRODUCTION	0.916991	1.65526	0.0109646	0.00846586
GOBP_POSITIVE_REGULATION_OF_T_HELPER_1_TYPE_IMMUNE_RESPONSE	0.922844	1.65509	0.00286276	0.00221035
GOBP_REGULATION_OF_CD8_POSITIVE_ALPHA_BETA_T_CELL_ACTIVATION	0.921692	1.65302	0.00293584	0.00226678
GOBP_REGULATION_OF_LIPID_KINASE_ACTIVITY	0.748566	1.65301	0.0248414	0.0191802
GOBP_T_CELL_HOMEOSTASIS	0.816596	1.65292	0.0140614	0.0108569
GOBP_POSITIVE_REGULATION_OF_REGULATORY_T_CELL_DIFFERENTIATION	0.915641	1.65282	0.0122494	0.00945784
GOBP_POSITIVE_REGULATION_OF_TYPE_2_IMMUNE_RESPONSE	0.923698	1.65273	0.00928445	0.00716857
GOBP_NEUTROPHIL_MEDIATED_IMMUNITY	0.823623	1.65252	0.0139102	0.0107401
GOBP_REGULATION_OF_VIRAL_GENOME_REPLICATION	0.724318	1.65247	0.00876868	0.00677034
GOBP_REGULATION_OF_MONOCYTE_CHEMOTAXIS	0.857346	1.65245	0.0259614	0.0200449
GOBP_VACUOLAR_LOCALIZATION	0.728258	1.65168	0.0173358	0.0133851
GOBP_MACROPHAGE_ACTIVATION_INVOLVED_IN_IMMUNE_RESPONSE	0.920647	1.65114	0.00302544	0.00233596
GOBP_REGULATION_OF_REGULATED_SECRETORY_PATHWAY	0.687558	1.64951	0.00343987	0.00265594
GOBP_DETECTION_OF_OTHER_ORGANISM	0.905679	1.64945	0.00989831	0.00764254
GOBP_POSITIVE_REGULATION_OF_T_HELPER_CELL_DIFFERENTIATION	0.879953	1.64937	0.0147735	0.0114067
GOBP_REGULATION_OF_SYNCYTIUM_FORMATION_BY_PLASMA_MEMBRANE_FUSION	0.854707	1.64931	0.0148408	0.0114587
GOBP_HOMEOSTASIS_OF_NUMBER_OF_CELLS	0.646838	1.64858	0.000310191	0.0002395
GOBP_FC_RECEPTOR_SIGNALING_PATHWAY	0.780589	1.64851	0.0124615	0.00962155
GOBP_NEGATIVE_REGULATION_OF_B_CELL_PROLIFERATION	0.919021	1.64823	0.00347093	0.00267993
GOBP_POSITIVE_REGULATION_OF_VASCULATURE_DEVELOPMENT	0.669863	1.64666	0.00204427	0.00157839
GOBP_INTERFERON_GAMMA_MEDIATED_SIGNALING_PATHWAY	0.861947	1.64632	0.0173358	0.0133851
GOBP_CD4_POSITIVE_ALPHA_BETA_T_CELL_CYTOKINE_PRODUCTION	0.911977	1.64621	0.0151124	0.0116684
GOBP_HETEROTYPIC_CELL_CELL_ADHESION	0.754388	1.64584	0.0136113	0.0105094
GOBP_IMMUNE_RESPONSE_TO_TUMOR_CELL	0.869731	1.64578	0.0216036	0.0166802
GOBP_PURINERGIC_NUCLEOTIDE_RECEPTOR_SIGNALING_PATHWAY	0.835767	1.64532	0.0127589	0.00985125
GOBP_REGULATION_OF_CELL_ADHESION_MEDIATED_BY_INTEGRIN	0.788864	1.64463	0.0211558	0.0163345
GOBP_DENDRITIC_CELL_ANTIGEN_PROCESSING_AND_PRESENTATION	0.95432	1.64412	0.00286685	0.00221351
GOBP_VIRAL_GENOME_REPLICATION	0.686348	1.64406	0.00617108	0.00476473
GOBP_RESPONSE_TO_TYPE_I_INTERFERON	0.753145	1.64312	0.0143008	0.0110417
GOBP_REGULATION_OF_CALCIUM_ION_TRANSPORT_INTO_CYTOSOL	0.702351	1.64196	0.00859953	0.00663974
GOBP_REGULATION_OF_TISSUE_REMODELING	0.712495	1.64132	0.0170256	0.0131455
GOBP_POSITIVE_REGULATION_OF_LYMPHOCYTE_APOPTOTIC_PROCESS	0.916573	1.63998	0.0131442	0.0101487
GOBP_INTERFERON_BETA_PRODUCTION	0.76218	1.63861	0.0180998	0.0139749
GOBP_NEGATIVE_REGULATION_OF_VIRAL_LIFE_CYCLE	0.849551	1.63743	0.0356226	0.0275044
GOBP_CELL_CELL_RECOGNITION	0.734716	1.63716	0.0132265	0.0102123
GOBP_RESPONSE_TO_INTERFERON_BETA	0.847829	1.63604	0.0179637	0.0138699
GOBP_REGULATION_OF_TOLERANCE_INDUCTION	0.905815	1.63508	0.0177469	0.0137025
GOBP_REGULATION_OF_BIOLOGICAL_PROCESS_INVOLVED_IN_SYMBIOTIC_INTERACTION	0.760022	1.63398	0.0191579	0.0147919
GOBP_POSITIVE_REGULATION_OF_HUMORAL_IMMUNE_RESPONSE	0.863231	1.63348	0.0260329	0.0201002
GOBP_REGULATION_OF_PHOSPHATIDYLINOSITOL_3_KINASE_SIGNALING	0.69177	1.63294	0.0122281	0.00944139
GOBP_POSITIVE_REGULATION_OF_PROTEIN_KINASE_B_SIGNALING	0.688925	1.63253	0.00675636	0.00521662
GOBP_NATURAL_KILLER_CELL_DIFFERENTIATION	0.858645	1.63227	0.0240713	0.0185856
GOBP_BONE_RESORPTION	0.744282	1.63142	0.0153327	0.0118385
GOBP_POSITIVE_REGULATION_OF_MACROPHAGE_ACTIVATION	0.843708	1.63089	0.0170256	0.0131455
GOBP_REGULATION_OF_CELLULAR_EXTRAVASATION	0.805457	1.63037	0.0259091	0.0200046
GOBP_REGULATION_OF_NEUTROPHIL_ACTIVATION	0.946002	1.62979	0.00489681	0.00378085
GOBP_T_HELPER_CELL_LINEAGE_COMMITMENT	0.910824	1.6297	0.0185127	0.0142937
GOBP_CD8_POSITIVE_ALPHA_BETA_T_CELL_DIFFERENTIATION	0.945295	1.62857	0.00510885	0.00394457
GOBP_B_CELL_HOMEOSTASIS	0.832456	1.62756	0.0165893	0.0128087
GOBP_MAINTENANCE_OF_LOCATION	0.630344	1.62749	0.000403359	0.000311435
GOBP_NEGATIVE_REGULATION_OF_VIRAL_ENTRY_INTO_HOST_CELL	0.868042	1.62704	0.0253728	0.0195905
GOBP_REGULATION_OF_SUPEROXIDE_ANION_GENERATION	0.866591	1.62432	0.0279784	0.0216023
GOBP_NEGATIVE_REGULATION_OF_INTERLEUKIN_10_PRODUCTION	0.866452	1.62406	0.0279784	0.0216023
GOBP_REGULATION_OF_MAST_CELL_ACTIVATION_INVOLVED_IN_IMMUNE_RESPONSE	0.824887	1.6239	0.020905	0.0161409
GOBP_DETECTION_OF_BIOTIC_STIMULUS	0.809005	1.62319	0.0209185	0.0161513
GOBP_POSITIVE_REGULATION_OF_LEUKOCYTE_ADHESION_TO_VASCULAR_ENDOTHELIAL_CELL	0.853834	1.62313	0.0279784	0.0216023
GOBP_POSITIVE_REGULATION_OF_LIPASE_ACTIVITY	0.730401	1.62256	0.0194649	0.0150289
GOBP_INTERFERON_ALPHA_PRODUCTION	0.838973	1.62173	0.0202471	0.0156329
GOBP_EOSINOPHIL_CHEMOTAXIS	0.902512	1.61862	0.00780776	0.00602841
GOBP_NEGATIVE_REGULATION_OF_TISSUE_REMODELING	0.863528	1.61858	0.031969	0.0246834
GOBP_POSITIVE_REGULATION_OF_T_CELL_APOPTOTIC_PROCESS	0.94927	1.61762	0.00555869	0.0042919
GOBP_REGULATION_OF_VASCULATURE_DEVELOPMENT	0.625015	1.61743	0.000285837	0.000220696
GOBP_POSITIVE_REGULATION_OF_LYMPHOCYTE_CHEMOTAXIS	0.887947	1.61716	0.0177469	0.0137025
GOBP_REGULATION_OF_RESPIRATORY_BURST	0.902385	1.6146	0.0252969	0.0195319
GOBP_POSITIVE_REGULATION_OF_DEFENSE_RESPONSE_TO_VIRUS_BY_HOST	0.834842	1.61375	0.0238075	0.0183819
GOBP_REGULATION_OF_NITRIC_OXIDE_METABOLIC_PROCESS	0.73561	1.61242	0.0198756	0.015346
GOBP_POSITIVE_REGULATION_OF_EPITHELIAL_CELL_APOPTOTIC_PROCESS	0.805731	1.61207	0.0321009	0.0247853
GOBP_NEGATIVE_REGULATION_OF_BONE_REMODELING	0.898276	1.61102	0.00921646	0.00711608
GOBP_POSITIVE_REGULATION_OF_SMOOTH_MUSCLE_CELL_PROLIFERATION	0.692291	1.61044	0.0185162	0.0142965
GOBP_NEGATIVE_REGULATION_OF_LYMPHOCYTE_APOPTOTIC_PROCESS	0.817706	1.60976	0.026494	0.0204562
GOBP_NEGATIVE_REGULATION_OF_T_CELL_MEDIATED_CYTOTOXICITY	0.968013	1.60963	0.00680429	0.00525363
GOBP_NEGATIVE_REGULATION_OF_SECRETION	0.660536	1.60961	0.00595075	0.00459461
GOBP_POSITIVE_REGULATION_OF_NEUROINFLAMMATORY_RESPONSE	0.910438	1.60933	0.0201973	0.0155944
GOBP_REGULATION_OF_HUMORAL_IMMUNE_RESPONSE_MEDIATED_BY_CIRCULATING_IMMUNOGLOBULIN	0.896863	1.60849	0.0103087	0.00795938
GOBP_POSITIVE_REGULATION_OF_CELL_ADHESION_MEDIATED_BY_INTEGRIN	0.87032	1.60742	0.0187062	0.0144431
GOBP_REGULATION_OF_RELEASE_OF_SEQUESTERED_CALCIUM_ION_INTO_CYTOSOL	0.707101	1.60647	0.0243996	0.0188391
GOBP_RESPONSE_TO_INTERFERON_ALPHA	0.889785	1.60615	0.0279027	0.0215438
GOBP_POSITIVE_REGULATION_OF_CALCIUM_ION_TRANSPORT_INTO_CYTOSOL	0.751385	1.60573	0.0207153	0.0159944
GOBP_REGULATION_OF_METAL_ION_TRANSPORT	0.614173	1.60566	0.000227829	0.000175908
GOBP_REGULATION_OF_PEPTIDASE_ACTIVITY	0.610957	1.60511	0.000181307	0.000139988
GOBP_VIRAL_PROCESS	0.613967	1.60355	0.000152282	0.000117578
GOBP_NATURAL_KILLER_CELL_PROLIFERATION	0.930349	1.60282	0.0138637	0.0107043
GOBP_POSITIVE_REGULATION_OF_MYELOID_CELL_DIFFERENTIATION	0.688982	1.60254	0.0177912	0.0137367
GOBP_REGULATION_OF_SUPEROXIDE_METABOLIC_PROCESS	0.813875	1.60222	0.0294085	0.0227065
GOBP_FC_EPSILON_RECEPTOR_SIGNALING_PATHWAY	0.84279	1.60213	0.0453805	0.0350386
GOBP_POSITIVE_REGULATION_OF_ACTIVATED_T_CELL_PROLIFERATION	0.829338	1.60035	0.0346014	0.0267159
GOBP_EXOCYTOSIS	0.616495	1.59995	0.000544159	0.000420148
GOBP_REACTIVE_OXYGEN_SPECIES_METABOLIC_PROCESS	0.639769	1.59929	0.00284607	0.00219747
GOBP_NEGATIVE_T_CELL_SELECTION	0.955108	1.59909	0.00528079	0.00407732
GOBP_G_PROTEIN_COUPLED_PURINERGIC_NUCLEOTIDE_RECEPTOR_SIGNALING_PATHWAY	0.928004	1.59878	0.0155226	0.0119851
GOBP_INTERLEUKIN_18_PRODUCTION	0.938154	1.59868	0.0103875	0.00802025
GOBP_REGULATION_OF_DENDRITIC_CELL_DIFFERENTIATION	0.914707	1.59838	0.0254379	0.0196408
GOBP_DENDRITIC_CELL_APOPTOTIC_PROCESS	0.965216	1.5983	0.00787407	0.00607961
GOBP_TOLL_LIKE_RECEPTOR_2_SIGNALING_PATHWAY	0.893162	1.59809	0.034833	0.0268947
GOBP_NATURAL_KILLER_CELL_CHEMOTAXIS	0.960858	1.59773	0.0112221	0.00866461
GOBP_POSITIVE_REGULATION_OF_RECEPTOR_SIGNALING_PATHWAY_VIA_STAT	0.764837	1.5976	0.033547	0.0259018
GOBP_LYMPH_NODE_DEVELOPMENT	0.890749	1.59752	0.0138603	0.0107016
GOBP_NEGATIVE_REGULATION_OF_T_CELL_APOPTOTIC_PROCESS	0.876613	1.59652	0.0263007	0.0203069
GOBP_INTEGRIN_MEDIATED_SIGNALING_PATHWAY	0.681194	1.59574	0.0192802	0.0148864
GOBP_HYPERSENSITIVITY	0.936216	1.59538	0.012387	0.00956409
GOBP_BIOLOGICAL_PROCESS_INVOLVED_IN_SYMBIOTIC_INTERACTION	0.624903	1.59507	0.00181126	0.00139848
GOBP_T_CELL_TOLERANCE_INDUCTION	0.911953	1.59357	0.0281655	0.0217468
GOBP_POSITIVE_REGULATION_OF_PHOSPHATIDYLINOSITOL_3_KINASE_SIGNALING	0.701116	1.59288	0.0308132	0.0237911
GOBP_POSITIVE_REGULATION_OF_CYSTEINE_TYPE_ENDOPEPTIDASE_ACTIVITY	0.66039	1.59275	0.00985697	0.00761062
GOBP_T_CELL_ACTIVATION_VIA_T_CELL_RECEPTOR_CONTACT_WITH_ANTIGEN_BOUND_TO_MHC_MOLECULE_ON_ANTIGEN_PRESENTING_CELL	0.957692	1.59246	0.0138277	0.0106764
GOBP_FC_GAMMA_RECEPTOR_SIGNALING_PATHWAY	0.822963	1.5924	0.0453805	0.0350386
GOBP_POSITIVE_REGULATION_OF_ENDOTHELIAL_CELL_APOPTOTIC_PROCESS	0.841427	1.59222	0.0472823	0.0365069
GOBP_POSITIVE_REGULATION_OF_LIPID_KINASE_ACTIVITY	0.793389	1.59186	0.0327243	0.0252666
GOBP_REACTIVE_NITROGEN_SPECIES_METABOLIC_PROCESS	0.700554	1.5916	0.0315192	0.0243361
GOBP_NEGATIVE_REGULATION_OF_ALPHA_BETA_T_CELL_ACTIVATION	0.785191	1.59078	0.0267071	0.0206207
GOBP_POSITIVE_REGULATION_OF_STRESS_ACTIVATED_PROTEIN_KINASE_SIGNALING_CASCADE	0.66145	1.59062	0.0244435	0.018873
GOBP_POSITIVE_REGULATION_OF_JNK_CASCADE	0.683575	1.59017	0.0232992	0.0179895
GOBP_PROTEIN_KINASE_B_SIGNALING	0.635926	1.58788	0.00584986	0.00451671
GOBP_CALCIUM_ION_TRANSMEMBRANE_TRANSPORT	0.617372	1.5861	0.00125658	0.000970213
GOBP_REGULATION_OF_CALCIUM_ION_TRANSMEMBRANE_TRANSPORT	0.654014	1.58598	0.00784689	0.00605862
GOBP_BASE_CONVERSION_OR_SUBSTITUTION_EDITING	0.870611	1.58559	0.0300182	0.0231772
GOBP_NEGATIVE_REGULATION_OF_LEUKOCYTE_DEGRANULATION	0.919644	1.58438	0.0233093	0.0179973
GOBP_COMPLEMENT_RECEPTOR_MEDIATED_SIGNALING_PATHWAY	0.929735	1.58433	0.0167306	0.0129178
GOBP_POSITIVE_REGULATION_OF_T_CELL_RECEPTOR_SIGNALING_PATHWAY	0.906463	1.58398	0.0328403	0.0253562
GOBP_ACUTE_PHASE_RESPONSE	0.757096	1.58356	0.0485804	0.0375092
GOBP_PLATELET_AGGREGATION	0.710548	1.58331	0.0327243	0.0252666
GOBP_POSITIVE_REGULATION_OF_INTERFERON_BETA_PRODUCTION	0.788577	1.5822	0.0364646	0.0281545
GOBP_REGULATION_OF_T_CELL_CHEMOTAXIS	0.884204	1.58206	0.044307	0.0342097
GOBP_POSITIVE_REGULATION_OF_PHOSPHOLIPASE_ACTIVITY	0.735422	1.58109	0.0419133	0.0323615
GOBP_HOMOTYPIC_CELL_CELL_ADHESION	0.682191	1.58087	0.0427413	0.0330008
GOBP_NEGATIVE_REGULATION_OF_NEUROINFLAMMATORY_RESPONSE	0.883145	1.58017	0.0450676	0.0347969
GOBP_PHOSPHATIDYLINOSITOL_3_KINASE_SIGNALING	0.654785	1.57923	0.0145632	0.0112443
GOBP_NEUTROPHIL_DEGRANULATION	0.916248	1.57853	0.0263007	0.0203069
GOBP_NEGATIVE_REGULATION_OF_MACROPHAGE_ACTIVATION	0.881933	1.578	0.0461653	0.0356445
GOBP_POSITIVE_REGULATION_OF_MACROPHAGE_CHEMOTAXIS	0.879647	1.57761	0.0215989	0.0166766
GOBP_T_HELPER_17_CELL_LINEAGE_COMMITMENT	0.925766	1.57757	0.020103	0.0155216
GOBP_FOAM_CELL_DIFFERENTIATION	0.782104	1.57731	0.0408442	0.031536
GOBP_INFLAMMATORY_RESPONSE_TO_WOUNDING	0.881418	1.57708	0.047243	0.0364766
GOBP_REGULATION_OF_BONE_REMODELING	0.755013	1.57708	0.0457042	0.0352885
GOBP_NEGATIVE_REGULATION_OF_OSTEOCLAST_DIFFERENTIATION	0.814387	1.57599	0.0412803	0.0318727
GOBP_DEFENSE_RESPONSE_TO_TUMOR_CELL	0.951576	1.57571	0.0232004	0.0179132
GOBP_POSITIVE_REGULATION_OF_NITRIC_OXIDE_METABOLIC_PROCESS	0.769645	1.57509	0.032454	0.0250579
GOBP_ACTIVATION_OF_CYSTEINE_TYPE_ENDOPEPTIDASE_ACTIVITY_INVOLVED_IN_APOPTOTIC_PROCESS	0.692973	1.57438	0.041329	0.0319104
GOBP_REGULATION_OF_BONE_RESORPTION	0.777061	1.57431	0.0333473	0.0257476
GOBP_RENAL_SYSTEM_PROCESS	0.666246	1.57394	0.0244859	0.0189057
GOBP_NEGATIVE_REGULATION_OF_LEUKOCYTE_CHEMOTAXIS	0.85188	1.57336	0.0338667	0.0261487
GOBP_RESPONSE_TO_ALCOHOL	0.626575	1.57207	0.00234702	0.00181215
GOBP_INOSITOL_LIPID_MEDIATED_SIGNALING	0.640389	1.57148	0.00570531	0.0044051
GOBP_CYTIDINE_TO_URIDINE_EDITING	0.938495	1.57127	0.0152712	0.011791
GOBP_REGULATION_OF_DENDRITIC_CELL_ANTIGEN_PROCESSING_AND_PRESENTATION	0.948771	1.57107	0.0263007	0.0203069
GOBP_POSITIVE_REGULATION_OF_T_HELPER_17_TYPE_IMMUNE_RESPONSE	0.911731	1.57075	0.0326284	0.0251925
GOBP_NEGATIVE_REGULATION_OF_INFLAMMATORY_RESPONSE_TO_ANTIGENIC_STIMULUS	0.81164	1.57067	0.0453805	0.0350386
GOBP_POSITIVE_REGULATION_OF_ION_TRANSPORT	0.616857	1.56934	0.00416685	0.00321725
GOBP_POSITIVE_REGULATION_OF_MHC_CLASS_II_BIOSYNTHETIC_PROCESS	0.943699	1.5692	0.0303609	0.0234418
GOBP_ESTABLISHMENT_OF_LYMPHOCYTE_POLARITY	0.920524	1.56864	0.0257138	0.0198538
GOBP_POSITIVE_REGULATION_OF_LIPID_METABOLIC_PROCESS	0.645859	1.5675	0.0258458	0.0199557
GOBP_POSITIVE_REGULATION_OF_HOMOTYPIC_CELL_CELL_ADHESION	0.896045	1.56577	0.0476033	0.0367547
GOBP_TOLL_LIKE_RECEPTOR_7_SIGNALING_PATHWAY	0.945451	1.56557	0.0321739	0.0248416
GOBP_NEGATIVE_REGULATION_OF_T_CELL_CYTOKINE_PRODUCTION	0.944299	1.56366	0.0346014	0.0267159
GOBP_T_HELPER_1_CELL_DIFFERENTIATION	0.846521	1.56346	0.0419133	0.0323615
GOBP_ACTIVATION_OF_PHOSPHOLIPASE_C_ACTIVITY	0.807888	1.56341	0.0478783	0.0369671
GOBP_REGULATION_OF_GTPASE_ACTIVITY	0.601199	1.56294	0.00217378	0.00167839
GOBP_REGULATION_OF_APOPTOTIC_CELL_CLEARANCE	0.939851	1.5628	0.0361294	0.0278957
GOBP_POSITIVE_REGULATION_OF_PROTEIN_KINASE_ACTIVITY	0.597568	1.56167	0.00190679	0.00147224
GOBP_REGULATION_OF_NATURAL_KILLER_CELL_DIFFERENTIATION	0.93275	1.56166	0.0223339	0.0172441
GOBP_POSITIVE_REGULATION_OF_KINASE_ACTIVITY	0.593917	1.56029	0.000181307	0.000139988
GOBP_POSITIVE_REGULATION_OF_MAP_KINASE_ACTIVITY	0.656253	1.55792	0.0223108	0.0172263
GOBP_NEGATIVE_REGULATION_OF_LOCOMOTION	0.596264	1.55761	0.00181271	0.00139961
GOBP_POSITIVE_REGULATION_OF_MYELOID_LEUKOCYTE_MEDIATED_IMMUNITY	0.855039	1.55722	0.0448198	0.0346056
GOBP_POSITIVE_REGULATION_OF_T_CELL_DIFFERENTIATION_IN_THYMUS	0.936403	1.55707	0.0419133	0.0323615
GOBP_REGULATION_OF_CHRONIC_INFLAMMATORY_RESPONSE	0.936337	1.55695	0.0419133	0.0323615
GOBP_RESPIRATORY_BURST_INVOLVED_IN_DEFENSE_RESPONSE	0.912123	1.55432	0.0336976	0.0260181
GOBP_REGULATION_OF_DNA_BINDING_TRANSCRIPTION_FACTOR_ACTIVITY	0.591543	1.55428	0.000362791	0.000280113
GOBP_POSITIVE_REGULATION_OF_RHO_PROTEIN_SIGNAL_TRANSDUCTION	0.794034	1.55244	0.0463352	0.0357756
GOBP_REGULATION_OF_BODY_FLUID_LEVELS	0.594155	1.5512	0.0021471	0.00165779
GOBP_TOLL_LIKE_RECEPTOR_3_SIGNALING_PATHWAY	0.851182	1.5502	0.0489423	0.0377886
GOBP_POSITIVE_REGULATION_OF_TOLERANCE_INDUCTION	0.92541	1.54937	0.0324648	0.0250662
GOBP_BIOLOGICAL_PROCESS_INVOLVED_IN_INTERACTION_WITH_HOST	0.62745	1.54785	0.0165173	0.0127531
GOBP_REGULATION_OF_MAP_KINASE_ACTIVITY	0.627371	1.54758	0.0112221	0.00866461
GOBP_POSITIVE_REGULATION_OF_PATTERN_RECOGNITION_RECEPTOR_SIGNALING_PATHWAY	0.756086	1.54735	0.0484081	0.0373761
GOBP_REGULATION_OF_T_HELPER_17_CELL_DIFFERENTIATION	0.858786	1.5402	0.0454065	0.0350586
GOBP_REGULATION_OF_ACUTE_INFLAMMATORY_RESPONSE_TO_ANTIGENIC_STIMULUS	0.901992	1.53706	0.0471129	0.0363761
GOBP_STRESS_ACTIVATED_PROTEIN_KINASE_SIGNALING_CASCADE	0.607064	1.53287	0.00694706	0.00536386
GOBP_REGULATION_OF_EPITHELIAL_CELL_APOPTOTIC_PROCESS	0.658215	1.53219	0.0406834	0.0314119
GOBP_PROTEIN_MONO_ADP_RIBOSYLATION	0.914945	1.53184	0.0427413	0.0330008
GOBP_NEGATIVE_REGULATION_OF_DNA_BINDING_TRANSCRIPTION_FACTOR_ACTIVITY	0.621524	1.5296	0.0183476	0.0141663
GOBP_VASCULAR_ENDOTHELIAL_GROWTH_FACTOR_PRODUCTION	0.703398	1.5226	0.0461653	0.0356445
GOBP_NEGATIVE_REGULATION_OF_PEPTIDASE_ACTIVITY	0.60015	1.52241	0.0151067	0.011664
GOBP_ENDOTHELIUM_DEVELOPMENT	0.632866	1.51742	0.0295877	0.0228448
GOBP_REGULATION_OF_CELL_SHAPE	0.627345	1.51693	0.026485	0.0204492
GOBP_POSITIVE_REGULATION_OF_PEPTIDASE_ACTIVITY	0.61212	1.51055	0.0294277	0.0227213
GOBP_POSITIVE_REGULATION_OF_ION_TRANSMEMBRANE_TRANSPORT	0.620277	1.50976	0.031969	0.0246834
GOBP_ADENYLATE_CYCLASE_MODULATING_G_PROTEIN_COUPLED_RECEPTOR_SIGNALING_PATHWAY	0.602082	1.50923	0.0170069	0.0131311
GOBP_ANATOMICAL_STRUCTURE_HOMEOSTASIS	0.585471	1.50792	0.00653513	0.00504581
GOBP_REGULATION_OF_ION_TRANSMEMBRANE_TRANSPORT	0.572333	1.50683	0.00207448	0.00160172
GOBP_REGULATION_OF_STRESS_ACTIVATED_PROTEIN_KINASE_SIGNALING_CASCADE	0.605265	1.50304	0.0258935	0.0199925
GOBP_AMINE_METABOLIC_PROCESS	0.631797	1.50302	0.0408442	0.031536
GOBP_POSITIVE_REGULATION_OF_DNA_BINDING_TRANSCRIPTION_FACTOR_ACTIVITY	0.59118	1.50203	0.0116392	0.00898667
GOBP_JNK_CASCADE	0.6133	1.50165	0.0329644	0.025452
GOBP_POSITIVE_REGULATION_OF_PROTEIN_CONTAINING_COMPLEX_ASSEMBLY	0.606778	1.49331	0.0339324	0.0261994
GOBP_SMOOTH_MUSCLE_CELL_PROLIFERATION	0.612557	1.49309	0.0328871	0.0253923
GOBP_TISSUE_REMODELING	0.606536	1.48706	0.0334218	0.0258051
GOBP_WOUND_HEALING	0.564779	1.48031	0.00335015	0.00258667
GOBP_REGULATION_OF_EXOCYTOSIS	0.597503	1.47891	0.033547	0.0259018
GOBP_REGULATION_OF_BLOOD_PRESSURE	0.600536	1.47624	0.0406221	0.0313646
GOBP_REGULATION_OF_SMALL_GTPASE_MEDIATED_SIGNAL_TRANSDUCTION	0.575407	1.47013	0.0144832	0.0111825
GOBP_RESPONSE_TO_MECHANICAL_STIMULUS	0.591884	1.46501	0.0464683	0.0358784
GOBP_EXTRINSIC_APOPTOTIC_SIGNALING_PATHWAY	0.584435	1.46096	0.0417599	0.0322431
GOBP_REGULATION_OF_CATION_TRANSMEMBRANE_TRANSPORT	0.55695	1.44481	0.0223339	0.0172441
GOBP_NEGATIVE_REGULATION_OF_TRANSPORT	0.54594	1.43736	0.00876075	0.00676422
GOBP_SMALL_GTPASE_MEDIATED_SIGNAL_TRANSDUCTION	0.54353	1.4344	0.0119714	0.00924318
GOBP_NEGATIVE_REGULATION_OF_HYDROLASE_ACTIVITY	0.540602	1.40586	0.033547	0.0259018
GOBP_NEGATIVE_REGULATION_OF_PROTEOLYSIS	0.538621	1.39768	0.0378408	0.0292171
GOBP_REGULATION_OF_ACTIN_FILAMENT_BASED_PROCESS	0.533807	1.39554	0.0435477	0.0336234
GOBP_CELL_SUBSTRATE_ADHESION	0.534101	1.3901	0.0485804	0.0375092
GOBP_ACTIN_FILAMENT_ORGANIZATION	0.516182	1.35454	0.0427413	0.0330008
GOBP_LIPID_LOCALIZATION	0.513149	1.35003	0.0484875	0.0374375
GOBP_AXON_DEVELOPMENT	-0.399572	-1.30114	0.0232004	0.0179132
GOBP_CANONICAL_WNT_SIGNALING_PATHWAY	-0.424337	-1.30904	0.0481274	0.0371594
GOBP_IN_UTERO_EMBRYONIC_DEVELOPMENT	-0.413735	-1.31105	0.0420782	0.0324888
GOBP_REGULATION_OF_MITOTIC_CELL_CYCLE	-0.403553	-1.3141	0.0187472	0.0144748
GOBP_PROTEASOMAL_PROTEIN_CATABOLIC_PROCESS	-0.406822	-1.32411	0.0183775	0.0141894
GOBP_CAMERA_TYPE_EYE_DEVELOPMENT	-0.42971	-1.32735	0.0270238	0.0208652
GOBP_ESTABLISHMENT_OF_PROTEIN_LOCALIZATION_TO_ORGANELLE	-0.413143	-1.33438	0.03052	0.0235647
GOBP_REGULATION_OF_CANONICAL_WNT_SIGNALING_PATHWAY	-0.446961	-1.34213	0.0419133	0.0323615
GOBP_GLYCOSYLATION	-0.452042	-1.34702	0.0470546	0.0363311
GOBP_GERM_CELL_DEVELOPMENT	-0.448353	-1.35128	0.0388004	0.029958
GOBP_SKIN_DEVELOPMENT	-0.446642	-1.35225	0.0423281	0.0326818
GOBP_CELLULAR_PROCESS_INVOLVED_IN_REPRODUCTION_IN_MULTICELLULAR_ORGANISM	-0.436078	-1.36522	0.0152559	0.0117792
GOBP_PROTEIN_CONTAINING_COMPLEX_DISASSEMBLY	-0.460305	-1.36705	0.0374499	0.0289153
GOBP_CELL_CELL_SIGNALING_BY_WNT	-0.425724	-1.37414	0.0139778	0.0107923
GOBP_REGIONALIZATION	-0.443688	-1.38075	0.0194618	0.0150265
GOBP_NUCLEAR_TRANSPORT	-0.448731	-1.38444	0.0295391	0.0228073
GOBP_PROTEIN_ACETYLATION	-0.477519	-1.39028	0.0336034	0.0259454
GOBP_NUCLEIC_ACID_PHOSPHODIESTER_BOND_HYDROLYSIS	-0.464423	-1.3903	0.026494	0.0204562
GOBP_REGULATION_OF_CELL_CYCLE_PHASE_TRANSITION	-0.435971	-1.39805	0.00868334	0.00670445
GOBP_MITOTIC_CELL_CYCLE_PHASE_TRANSITION	-0.435411	-1.39828	0.00901833	0.0069631
GOBP_REGULATION_OF_PROTEIN_STABILITY	-0.461058	-1.41725	0.017331	0.0133814
GOBP_EPIDERMAL_CELL_DIFFERENTIATION	-0.490553	-1.42516	0.032866	0.025376
GOBP_SMOOTHENED_SIGNALING_PATHWAY	-0.526923	-1.44107	0.0450051	0.0347486
GOBP_CELLULAR_RESPIRATION	-0.495178	-1.4415	0.0234218	0.0180841
GOBP_PROTEIN_ACYLATION	-0.480857	-1.4424	0.0106	0.00818428
GOBP_FERTILIZATION	-0.503232	-1.44472	0.0283822	0.021914
GOBP_RNA_MODIFICATION	-0.510449	-1.44577	0.0441083	0.0340562
GOBP_MACROAUTOPHAGY	-0.470983	-1.448	0.0123195	0.00951196
GOBP_MITOCHONDRIAL_TRANSPORT	-0.509984	-1.45357	0.028869	0.0222899
GOBP_PATTERN_SPECIFICATION_PROCESS	-0.452631	-1.45905	0.00199357	0.00153925
GOBP_TRANSLATIONAL_INITIATION	-0.539578	-1.45944	0.0417599	0.0322431
GOBP_KINETOCHORE_ORGANIZATION	-0.742055	-1.45983	0.0427413	0.0330008
GOBP_HISTONE_ARGININE_METHYLATION	-0.82054	-1.4615	0.0475683	0.0367277
GOBP_SMOOTHENED_SIGNALING_PATHWAY_INVOLVED_IN_DORSAL_VENTRAL_NEURAL_TUBE_PATTERNING	-0.820759	-1.46189	0.0475683	0.0367277
GOBP_RIBOSOMAL_SUBUNIT_EXPORT_FROM_NUCLEUS	-0.803106	-1.46361	0.0482214	0.037232
GOBP_MITOTIC_RECOMBINATION	-0.725485	-1.4642	0.0328403	0.0253562
GOBP_ASPARTATE_FAMILY_AMINO_ACID_BIOSYNTHETIC_PROCESS	-0.744734	-1.4651	0.0408535	0.0315432
GOBP_POSITIVE_REGULATION_OF_CELL_CYCLE_PROCESS	-0.4945	-1.46558	0.0103087	0.00795938
GOBP_PALLIUM_DEVELOPMENT	-0.515802	-1.46626	0.0222367	0.0171691
GOBP_REGULATION_OF_PROTEIN_LOCALIZATION_TO_CHROMOSOME_TELOMERIC_REGION	-0.814554	-1.46773	0.0494207	0.038158
GOBP_POSITIVE_REGULATION_OF_MRNA_SPLICING_VIA_SPLICEOSOME	-0.739013	-1.47011	0.0419098	0.0323588
GOBP_EPIDERMIS_DEVELOPMENT	-0.475578	-1.47268	0.00313779	0.0024227
GOBP_CHROMATIN_ASSEMBLY_OR_DISASSEMBLY	-0.51839	-1.4734	0.0253728	0.0195905
GOBP_MISMATCH_REPAIR	-0.692018	-1.47432	0.0450051	0.0347486
GOBP_TAIL_ANCHORED_MEMBRANE_PROTEIN_INSERTION_INTO_ER_MEMBRANE	-0.803206	-1.47617	0.0486978	0.0375998
GOBP_REGULATION_OF_DNA_REPLICATION	-0.541017	-1.47699	0.0410599	0.0317026
GOBP_NEGATIVE_REGULATION_OF_CELL_CYCLE_PHASE_TRANSITION	-0.493311	-1.47715	0.0140614	0.0108569
GOBP_REGULATION_OF_STEM_CELL_DIFFERENTIATION	-0.610602	-1.47749	0.0466643	0.0360298
GOBP_PEPTIDYL_METHIONINE_MODIFICATION	-0.82013	-1.47778	0.042225	0.0326021
GOBP_PROTEIN_METHYLATION	-0.518013	-1.47789	0.0139583	0.0107773
GOBP_CENTROMERE_COMPLEX_ASSEMBLY	-0.721606	-1.4786	0.0463352	0.0357756
GOBP_PROTEIN_LOCALIZATION_TO_CHROMOSOME_CENTROMERIC_REGION	-0.743333	-1.4787	0.0357144	0.0275753
GOBP_PROTEIN_HETEROTETRAMERIZATION	-0.806745	-1.48267	0.0419133	0.0323615
GOBP_PROTEIN_HYDROXYLATION	-0.727608	-1.4835	0.0453805	0.0350386
GOBP_STRESS_GRANULE_ASSEMBLY	-0.724297	-1.48411	0.0419133	0.0323615
GOBP_REGULATION_OF_DNA_REPAIR	-0.536934	-1.48467	0.0324648	0.0250662
GOBP_MITOCHONDRIAL_CYTOCHROME_C_OXIDASE_ASSEMBLY	-0.754825	-1.48495	0.032023	0.0247252
GOBP_MEIOTIC_CELL_CYCLE_PROCESS	-0.518249	-1.48708	0.0105582	0.00815202
GOBP_ANTERIOR_POSTERIOR_PATTERN_SPECIFICATION	-0.513787	-1.49172	0.00821641	0.00634393
GOBP_PROTEIN_CONTAINING_COMPLEX_LOCALIZATION	-0.535407	-1.49272	0.0241602	0.0186542
GOBP_POSITIVE_REGULATION_OF_DNA_REPLICATION	-0.672767	-1.49292	0.0442002	0.0341272
GOBP_PEPTIDYL_ARGININE_N_METHYLATION	-0.853331	-1.49296	0.0432341	0.0333813
GOBP_MITOCHONDRION_ORGANIZATION	-0.459844	-1.49319	0.000723099	0.000558309
GOBP_PROTEIN_FOLDING	-0.515124	-1.4933	0.00971879	0.00750393
GOBP_NUCLEAR_EXPORT	-0.530014	-1.49398	0.0182512	0.0140918
GOBP_PYRIMIDINE_RIBONUCLEOSIDE_TRIPHOSPHATE_METABOLIC_PROCESS	-0.780855	-1.4949	0.034749	0.0268299
GOBP_AEROBIC_RESPIRATION	-0.524707	-1.49569	0.0164785	0.0127231
GOBP_ESTABLISHMENT_OF_PROTEIN_LOCALIZATION_TO_CHROMOSOME	-0.760302	-1.49729	0.0363054	0.0280316
GOBP_REGULATION_OF_SPINDLE_ORGANIZATION	-0.663323	-1.49793	0.0423592	0.0327058
GOBP_POSITIVE_REGULATION_OF_SMOOTHENED_SIGNALING_PATHWAY	-0.703529	-1.49884	0.0321739	0.0248416
GOBP_MITOCHONDRIAL_FUSION	-0.731584	-1.49904	0.031969	0.0246834
GOBP_PROTEASOME_MEDIATED_UBIQUITIN_DEPENDENT_PROTEIN_CATABOLIC_PROCESS	-0.468454	-1.49972	0.00159793	0.00123377
GOBP_PROTEIN_LOCALIZATION_TO_CHROMOSOME	-0.588424	-1.49976	0.0474074	0.0366035
GOBP_PROTEIN_LOCALIZATION_TO_CILIARY_MEMBRANE	-0.783419	-1.49981	0.0328403	0.0253562
GOBP_POSITIVE_REGULATION_OF_CELL_CYCLE	-0.486674	-1.5	0.00192916	0.00148952
GOBP_FEMALE_MEIOTIC_NUCLEAR_DIVISION	-0.721003	-1.5005	0.0357756	0.0276225
GOBP_MRNA_CATABOLIC_PROCESS	-0.513483	-1.50117	0.00577546	0.00445927
GOBP_ANTEROGRADE_AXONAL_TRANSPORT	-0.655777	-1.50139	0.0438382	0.0338477
GOBP_POSITIVE_REGULATION_OF_MRNA_PROCESSING	-0.711045	-1.50431	0.0319795	0.0246916
GOBP_MICROTUBULE_ANCHORING	-0.763941	-1.50445	0.0323193	0.0249539
GOBP_DENDRITE_MORPHOGENESIS	-0.544957	-1.50562	0.0177469	0.0137025
GOBP_PSEUDOURIDINE_SYNTHESIS	-0.786665	-1.50602	0.0280972	0.021694
GOBP_ATTACHMENT_OF_SPINDLE_MICROTUBULES_TO_KINETOCHORE	-0.706957	-1.50615	0.03052	0.0235647
GOBP_POSITIVE_REGULATION_OF_RNA_SPLICING	-0.687454	-1.50697	0.0360476	0.0278326
GOBP_NEGATIVE_REGULATION_OF_CELL_CYCLE_PROCESS	-0.491086	-1.50807	0.00464124	0.00358353
GOBP_TELOMERASE_RNA_LOCALIZATION	-0.777544	-1.50837	0.0470518	0.036329
GOBP_SPECIFICATION_OF_SYMMETRY	-0.545657	-1.50879	0.0254379	0.0196408
GOBP_SPINDLE_LOCALIZATION	-0.643369	-1.5096	0.0324648	0.0250662
GOBP_MATURATION_OF_5_8S_RRNA_FROM_TRICISTRONIC_RRNA_TRANSCRIPT_SSU_RRNA_5_8S_RRNA_LSU_RRNA	-0.758298	-1.5105	0.0202497	0.0156349
GOBP_NON_MEMBRANE_BOUNDED_ORGANELLE_ASSEMBLY	-0.477719	-1.51172	0.00129561	0.00100035
GOBP_MATURATION_OF_LSU_RRNA_FROM_TRICISTRONIC_RRNA_TRANSCRIPT_SSU_RRNA_5_8S_RRNA_LSU_RRNA	-0.822607	-1.51182	0.0263007	0.0203069
GOBP_SISTER_CHROMATID_COHESION	-0.644419	-1.51206	0.0324648	0.0250662
GOBP_POSITIVE_REGULATION_OF_DNA_TEMPLATED_TRANSCRIPTION_INITIATION	-0.664565	-1.51554	0.0445309	0.0343825
GOBP_DNA_TEMPLATED_TRANSCRIPTION_TERMINATION	-0.781404	-1.51586	0.0408634	0.0315508
GOBP_PEPTIDYL_LYSINE_MODIFICATION	-0.484646	-1.51631	0.000685822	0.000529527
GOBP_PROTEIN_HETEROOLIGOMERIZATION	-0.740601	-1.51752	0.0240713	0.0185856
GOBP_PIGMENTATION	-0.577229	-1.51779	0.0323626	0.0249873
GOBP_MITOCHONDRIAL_MEMBRANE_ORGANIZATION	-0.571481	-1.5185	0.0293968	0.0226974
GOBP_TETRAPYRROLE_BIOSYNTHETIC_PROCESS	-0.719766	-1.52276	0.0254379	0.0196408
GOBP_NEURAL_TUBE_DEVELOPMENT	-0.539818	-1.52304	0.0185605	0.0143307
GOBP_ENERGY_DERIVATION_BY_OXIDATION_OF_ORGANIC_COMPOUNDS	-0.494379	-1.52372	0.0025218	0.0019471
GOBP_POSITIVE_REGULATION_OF_CHROMOSOME_ORGANIZATION	-0.598113	-1.52671	0.031969	0.0246834
GOBP_RECOMBINATIONAL_REPAIR	-0.541988	-1.52745	0.0147735	0.0114067
GOBP_CHROMATIN_ORGANIZATION	-0.470698	-1.52745	0.000178527	0.000137841
GOBP_BASE_EXCISION_REPAIR	-0.679679	-1.52758	0.0494207	0.038158
GOBP_MRNA_MODIFICATION	-0.745568	-1.5277	0.0199891	0.0154337
GOBP_DNA_TEMPLATED_TRANSCRIPTION_ELONGATION	-0.605438	-1.52826	0.0321874	0.0248521
GOBP_RESPIRATORY_ELECTRON_TRANSPORT_CHAIN	-0.574814	-1.52933	0.0210728	0.0162704
GOBP_POSITIVE_REGULATION_OF_TELOMERASE_RNA_LOCALIZATION_TO_CAJAL_BODY	-0.832424	-1.52986	0.0194618	0.0150265
GOBP_NUCLEAR_PORE_ORGANIZATION	-0.839483	-1.52991	0.019776	0.0152691
GOBP_CYTOPLASMIC_TRANSLATIONAL_INITIATION	-0.751089	-1.53137	0.0192472	0.0148609
GOBP_HAIR_FOLLICLE_MATURATION	-0.834216	-1.53316	0.0186988	0.0144375
GOBP_NEGATIVE_REGULATION_OF_MRNA_PROCESSING	-0.737163	-1.53413	0.0195937	0.0151284
GOBP_ATP_SYNTHESIS_COUPLED_ELECTRON_TRANSPORT	-0.594329	-1.53496	0.0264643	0.0204333
GOBP_SECONDARY_METABOLITE_BIOSYNTHETIC_PROCESS	-0.760594	-1.53506	0.00976284	0.00753794
GOBP_POSITIVE_REGULATION_OF_UBIQUITIN_PROTEIN_TRANSFERASE_ACTIVITY	-0.725627	-1.53515	0.0211618	0.0163392
GOBP_TRANSCRIPTION_PREINITIATION_COMPLEX_ASSEMBLY	-0.686343	-1.53646	0.0277883	0.0214555
GOBP_DNA_STRAND_ELONGATION	-0.709106	-1.5389	0.0205351	0.0158553
GOBP_RESPIRATORY_CHAIN_COMPLEX_IV_ASSEMBLY	-0.762506	-1.53892	0.00909199	0.00701998
GOBP_POSITIVE_REGULATION_OF_CELL_CYCLE_G2_M_PHASE_TRANSITION	-0.732282	-1.54007	0.0182512	0.0140918
GOBP_AUTOPHAGY_OF_MITOCHONDRION	-0.603682	-1.54287	0.0327767	0.0253071
GOBP_TRANSCRIPTION_BY_RNA_POLYMERASE_I	-0.676908	-1.54369	0.0266039	0.020541
GOBP_SPLICEOSOMAL_SNRNP_ASSEMBLY	-0.667215	-1.54442	0.0345708	0.0266923
GOBP_REGULATION_OF_TRANSLATIONAL_FIDELITY	-0.827098	-1.54657	0.0193289	0.0149239
GOBP_PROTEIN_LOCALIZATION_TO_CYTOSKELETON	-0.645399	-1.54692	0.039174	0.0302465
GOBP_PROTEIN_MANNOSYLATION	-0.808651	-1.54811	0.0136113	0.0105094
GOBP_PROTEIN_INSERTION_INTO_ER_MEMBRANE	-0.788661	-1.55152	0.00989638	0.00764105
GOBP_PROTEIN_MODIFICATION_BY_SMALL_PROTEIN_REMOVAL	-0.5472	-1.55186	0.00561564	0.00433587
GOBP_TRANSLATIONAL_ELONGATION	-0.674798	-1.55229	0.0241343	0.0186343
GOBP_HISTONE_MODIFICATION	-0.477168	-1.55307	0.000156583	0.000120899
GOBP_REGULATION_OF_MICROTUBULE_POLYMERIZATION_OR_DEPOLYMERIZATION	-0.608489	-1.5532	0.0219792	0.0169702
GOBP_MEIOTIC_CELL_CYCLE	-0.517689	-1.55426	0.00319221	0.00246472
GOBP_CLEAVAGE_INVOLVED_IN_RRNA_PROCESSING	-0.759153	-1.55553	0.0104904	0.00809969
GOBP_PROXIMAL_DISTAL_PATTERN_FORMATION	-0.727053	-1.55637	0.0228367	0.0176324
GOBP_PROTEIN_LOCALIZATION_TO_CHROMOSOME_TELOMERIC_REGION	-0.747891	-1.55645	0.0113467	0.00876088
GOBP_PIGMENT_METABOLIC_PROCESS	-0.610148	-1.55872	0.0183173	0.0141429
GOBP_N_TERMINAL_PROTEIN_AMINO_ACID_MODIFICATION	-0.753776	-1.55899	0.0163845	0.0126506
GOBP_CHROMATIN_REMODELING	-0.540587	-1.56169	0.00243788	0.0018823
GOBP_PEPTIDYL_ARGININE_METHYLATION	-0.835985	-1.56319	0.0151053	0.0116629
GOBP_CELL_CYCLE_G2_M_PHASE_TRANSITION	-0.561311	-1.56445	0.0073444	0.00567065
GOBP_MRNA_EXPORT_FROM_NUCLEUS	-0.646004	-1.56752	0.0152559	0.0117792
GOBP_METHYLATION	-0.508583	-1.5712	0.000337588	0.000260654
GOBP_SPLICEOSOMAL_COMPLEX_ASSEMBLY	-0.62725	-1.57206	0.0225111	0.017381
GOBP_RRNA_TRANSCRIPTION	-0.760521	-1.57294	0.0129164	0.00997282
GOBP_SNRNA_PROCESSING	-0.740041	-1.57663	0.00694918	0.0053655
GOBP_MELANOCYTE_DIFFERENTIATION	-0.783493	-1.58128	0.00362387	0.00279801
GOBP_REGULATION_OF_ALTERNATIVE_MRNA_SPLICING_VIA_SPLICEOSOME	-0.653399	-1.58261	0.0137126	0.0105876
GOBP_NCRNA_TRANSCRIPTION	-0.682351	-1.58356	0.0126701	0.00978264
GOBP_AXO_DENDRITIC_TRANSPORT	-0.628129	-1.58554	0.0137828	0.0106418
GOBP_AMINO_ACID_ACTIVATION	-0.778151	-1.58655	0.00694918	0.0053655
GOBP_MONOUBIQUITINATED_PROTEIN_DEUBIQUITINATION	-0.745831	-1.58897	0.00530693	0.00409751
GOBP_DNA_PACKAGING	-0.558635	-1.59213	0.00422598	0.0032629
GOBP_NADH_DEHYDROGENASE_COMPLEX_ASSEMBLY	-0.679575	-1.59455	0.0049074	0.00378903
GOBP_CHROMOSOME_CONDENSATION	-0.749776	-1.59737	0.00439442	0.00339295
GOBP_SINGLE_FERTILIZATION	-0.574825	-1.59849	0.00439826	0.00339592
GOBP_HISTONE_DEUBIQUITINATION	-0.73227	-1.60263	0.00736252	0.00568464
GOBP_NEGATIVE_REGULATION_OF_CHROMOSOME_ORGANIZATION	-0.627964	-1.60291	0.010128	0.00781985
GOBP_DOUBLE_STRAND_BREAK_REPAIR	-0.534107	-1.60506	0.0012264	0.000946911
GOBP_MITOTIC_METAPHASE_PLATE_CONGRESSION	-0.685734	-1.60523	0.00650536	0.00502282
GOBP_AXONAL_TRANSPORT	-0.660831	-1.606	0.00905782	0.00699359
GOBP_MATURATION_OF_SSU_RRNA_FROM_TRICISTRONIC_RRNA_TRANSCRIPT_SSU_RRNA_5_8S_RRNA_LSU_RRNA	-0.753904	-1.60617	0.00362387	0.00279801
GOBP_NUCLEOBASE_CONTAINING_COMPOUND_TRANSPORT	-0.551841	-1.60666	0.000933837	0.00072102
GOBP_SNRNA_METABOLIC_PROCESS	-0.663649	-1.60744	0.00912616	0.00704636
GOBP_SPINDLE_ASSEMBLY	-0.581327	-1.60879	0.00512265	0.00395523
GOBP_CILIUM_ORGANIZATION	-0.51548	-1.60939	0.000148409	0.000114588
GOBP_REGULATION_OF_CHROMOSOME_SEPARATION	-0.639162	-1.61112	0.0106787	0.00824507
GOBP_MICROTUBULE_NUCLEATION	-0.747438	-1.61263	0.00537524	0.00415025
GOBP_TRNA_METHYLATION	-0.728299	-1.61614	0.00416136	0.00321301
GOBP_HINDLIMB_MORPHOGENESIS	-0.74965	-1.6174	0.00505804	0.00390534
GOBP_RIBOSOMAL_LARGE_SUBUNIT_ASSEMBLY	-0.793509	-1.61786	0.00339414	0.00262063
GOBP_RRNA_METHYLATION	-0.821598	-1.618	0.00322511	0.00249012
GOBP_PROTEIN_TRANSMEMBRANE_TRANSPORT	-0.668999	-1.61879	0.0072469	0.00559537
GOBP_INTRACILIARY_TRANSPORT	-0.752543	-1.62364	0.00466565	0.00360237
GOBP_DNA_REPLICATION_INITIATION	-0.743255	-1.62667	0.00406738	0.00314044
GOBP_METAPHASE_ANAPHASE_TRANSITION_OF_CELL_CYCLE	-0.667536	-1.6267	0.00701229	0.00541422
GOBP_ORGANELLE_DISASSEMBLY	-0.609499	-1.62826	0.00353817	0.00273184
GOBP_REGULATION_OF_DNA_TEMPLATED_TRANSCRIPTION_INITIATION	-0.683317	-1.63038	0.00362387	0.00279801
GOBP_INNER_MITOCHONDRIAL_MEMBRANE_ORGANIZATION	-0.766569	-1.63315	0.00211162	0.00163039
GOBP_MRNA_TRANSPORT	-0.606897	-1.64108	0.00198195	0.00153027
GOBP_REGULATION_OF_CHROMOSOME_SEGREGATION	-0.64046	-1.64681	0.00687738	0.00531006
GOBP_MITOTIC_DNA_INTEGRITY_CHECKPOINT_SIGNALING	-0.652399	-1.64868	0.00434819	0.00335726
GOBP_TELOMERE_MAINTENANCE	-0.603934	-1.64905	0.00241475	0.00186444
GOBP_CENTRIOLE_ASSEMBLY	-0.729608	-1.64948	0.00302544	0.00233596
GOBP_MICROTUBULE_POLYMERIZATION	-0.648194	-1.65125	0.00457363	0.00353133
GOBP_PROTEIN_LOCALIZATION_TO_CILIUM	-0.658852	-1.65127	0.00505128	0.00390012
GOBP_REGULATION_OF_MICROTUBULE_CYTOSKELETON_ORGANIZATION	-0.593989	-1.65178	0.00140244	0.00108283
GOBP_ESTABLISHMENT_OF_RNA_LOCALIZATION	-0.582966	-1.65818	0.00104774	0.000808969
GOBP_TELOMERE_ORGANIZATION	-0.603366	-1.65906	0.00189217	0.00146096
GOBP_CHROMOSOME_SEPARATION	-0.638976	-1.65927	0.00278778	0.00215246
GOBP_MANNOSYLATION	-0.788973	-1.6593	0.00132877	0.00102595
GOBP_PROTEIN_TRANSMEMBRANE_IMPORT_INTO_INTRACELLULAR_ORGANELLE	-0.769111	-1.65939	0.00220686	0.00170393
GOBP_DNA_DEPENDENT_DNA_REPLICATION	-0.589283	-1.6626	0.00180806	0.00139601
GOBP_MATURATION_OF_LSU_RRNA	-0.812243	-1.66432	0.000715897	0.000552748
GOBP_ALTERNATIVE_MRNA_SPLICING_VIA_SPLICEOSOME	-0.662191	-1.66559	0.00357124	0.00275737
GOBP_MATURATION_OF_5_8S_RRNA	-0.778231	-1.66593	0.00173614	0.00134048
GOBP_MITOTIC_SPINDLE_ASSEMBLY	-0.675919	-1.66743	0.00237322	0.00183238
GOBP_NUCLEOSOME_ORGANIZATION	-0.630768	-1.66828	0.00231031	0.00178381
GOBP_EMBRYONIC_DIGIT_MORPHOGENESIS	-0.710167	-1.67136	0.00182739	0.00141094
GOBP_RNA_POLYADENYLATION	-0.74047	-1.67215	0.00125353	0.000967859
GOBP_GOLGI_VESICLE_TRANSPORT	-0.542698	-1.67264	9.04e-05	6.98e-05
GOBP_TRANSCRIPTION_INITIATION_FROM_RNA_POLYMERASE_II_PROMOTER	-0.662701	-1.67281	0.00245584	0.00189617
GOBP_GOLGI_ORGANIZATION	-0.588664	-1.67623	0.00108677	0.0008391
GOBP_MICROTUBULE_POLYMERIZATION_OR_DEPOLYMERIZATION	-0.62084	-1.67769	0.00190275	0.00146912
GOBP_RRNA_MODIFICATION	-0.788562	-1.68	0.000690924	0.000533466
GOBP_SPINDLE_ORGANIZATION	-0.581772	-1.68598	0.000217172	0.00016768
GOBP_NUCLEOTIDE_EXCISION_REPAIR	-0.701068	-1.68724	0.00106265	0.00082048
GOBP_MICROTUBULE_BASED_TRANSPORT	-0.592244	-1.69941	0.00028191	0.000217664
GOBP_MATURATION_OF_SSU_RRNA	-0.752748	-1.7018	0.000769752	0.000594329
GOBP_REGULATION_OF_MRNA_METABOLIC_PROCESS	-0.55823	-1.70372	2.74e-05	2.12e-05
GOBP_MICROTUBULE_BASED_MOVEMENT	-0.547486	-1.70566	6.5e-06	5.02e-06
GOBP_PROTEIN_DNA_COMPLEX_ASSEMBLY	-0.625482	-1.70789	0.000634393	0.000489818
GOBP_DNA_INTEGRITY_CHECKPOINT_SIGNALING	-0.634063	-1.70809	0.000663143	0.000512017
GOBP_NCRNA_3_END_PROCESSING	-0.749623	-1.70952	0.000405416	0.000313024
GOBP_ENDOPLASMIC_RETICULUM_ORGANIZATION	-0.671939	-1.71174	0.000938841	0.000724884
GOBP_REGULATION_OF_CYTOKINESIS	-0.661078	-1.71301	0.000701094	0.000541319
GOBP_INTRACELLULAR_PROTEIN_TRANSMEMBRANE_TRANSPORT	-0.739409	-1.71597	0.000539381	0.000416459
GOBP_MITOCHONDRIAL_RNA_METABOLIC_PROCESS	-0.759234	-1.71646	0.000556266	0.000429496
GOBP_METAPHASE_PLATE_CONGRESSION	-0.696252	-1.71712	0.00149514	0.0011544
GOBP_GPI_ANCHOR_METABOLIC_PROCESS	-0.816769	-1.71776	0.000267816	0.000206782
GOBP_TRANSPORT_ALONG_MICROTUBULE	-0.617935	-1.71906	0.000294856	0.00022766
GOBP_REGULATION_OF_MICROTUBULE_BASED_PROCESS	-0.580108	-1.72585	1.89e-05	1.46e-05
GOBP_RNA_EXPORT_FROM_NUCLEUS	-0.677041	-1.72818	0.000389566	0.000300786
GOBP_RNA_LOCALIZATION	-0.604421	-1.73564	1.87e-05	1.44e-05
GOBP_MITOTIC_CELL_CYCLE_CHECKPOINT_SIGNALING	-0.638749	-1.73968	0.000372103	0.000287303
GOBP_REGULATION_OF_CHROMOSOME_ORGANIZATION	-0.605204	-1.75493	1.58e-05	1.22e-05
GOBP_CHROMOSOME_LOCALIZATION	-0.694336	-1.75871	0.000184057	0.000142112
GOBP_MRNA_3_END_PROCESSING	-0.728193	-1.76377	0.000329516	0.000254421
GOBP_MITOTIC_NUCLEAR_DIVISION	-0.576983	-1.76439	3.23e-06	2.49e-06
GOBP_MITOCHONDRIAL_RESPIRATORY_CHAIN_COMPLEX_ASSEMBLY	-0.686696	-1.7657	0.00028191	0.000217664
GOBP_CYTOSKELETON_DEPENDENT_CYTOKINESIS	-0.692686	-1.7657	8.73e-05	6.74e-05
GOBP_MITOTIC_CYTOKINESIS	-0.70756	-1.76947	0.000186606	0.00014408
GOBP_EMBRYONIC_APPENDAGE_MORPHOGENESIS	-0.657903	-1.77231	7.3e-05	5.64e-05
GOBP_DNA_REPLICATION	-0.588792	-1.77724	1.18e-06	9.12e-07
GOBP_APPENDAGE_DEVELOPMENT	-0.621316	-1.77807	2.43e-05	1.88e-05
GOBP_CENTROSOME_DUPLICATION	-0.70656	-1.78101	0.000172591	0.000133259
GOBP_CELL_CYCLE_CHECKPOINT_SIGNALING	-0.63045	-1.78796	1.1e-05	8.52e-06
GOBP_REGULATION_OF_RNA_SPLICING	-0.635274	-1.79068	2.1e-05	1.62e-05
GOBP_PIGMENT_BIOSYNTHETIC_PROCESS	-0.738446	-1.7995	4.3e-05	3.32e-05
GOBP_ENDOPLASMIC_RETICULUM_TO_GOLGI_VESICLE_MEDIATED_TRANSPORT	-0.651093	-1.80033	3.67e-05	2.83e-05
GOBP_REGULATION_OF_MRNA_SPLICING_VIA_SPLICEOSOME	-0.682394	-1.80499	3.5e-05	2.7e-05
GOBP_ORGANELLE_FISSION	-0.555161	-1.80728	1.28e-08	9.85e-09
GOBP_DNA_TEMPLATED_TRANSCRIPTION_INITIATION	-0.670932	-1.80755	2.31e-05	1.79e-05
GOBP_MITOTIC_SPINDLE_ORGANIZATION	-0.669193	-1.80928	1.82e-05	1.4e-05
GOBP_RIBOSOME_ASSEMBLY	-0.75802	-1.81685	5.16e-05	3.98e-05
GOBP_KERATINIZATION	-0.759863	-1.82127	4.3e-05	3.32e-05
GOBP_APPENDAGE_MORPHOGENESIS	-0.659105	-1.82555	1.01e-05	7.77e-06
GOBP_MITOTIC_SISTER_CHROMATID_SEGREGATION	-0.643552	-1.82892	1.64e-06	1.26e-06
GOBP_PROTEIN_DNA_COMPLEX_SUBUNIT_ORGANIZATION	-0.640361	-1.83089	1.38e-06	1.07e-06
GOBP_DNA_CONFORMATION_CHANGE	-0.613852	-1.85008	4.25e-08	3.28e-08
GOBP_RNA_METHYLATION	-0.733714	-1.85231	1.69e-05	1.31e-05
GOBP_DNA_REPAIR	-0.574077	-1.85918	4.12e-09	3.18e-09
GOBP_MICROTUBULE_CYTOSKELETON_ORGANIZATION_INVOLVED_IN_MITOSIS	-0.668263	-1.86254	1.08e-06	8.34e-07
GOBP_SISTER_CHROMATID_SEGREGATION	-0.643986	-1.86673	4.29e-07	3.31e-07
GOBP_CYTOKINESIS	-0.656464	-1.86929	1.29e-06	9.94e-07
GOBP_DNA_GEOMETRIC_CHANGE	-0.718501	-1.86965	1.22e-06	9.42e-07
GOBP_REGULATION_OF_MRNA_PROCESSING	-0.675453	-1.87083	1.04e-06	8.03e-07
GOBP_TRNA_MODIFICATION	-0.732331	-1.87167	2.33e-06	1.8e-06
GOBP_RIBOSOMAL_SMALL_SUBUNIT_BIOGENESIS	-0.760088	-1.87506	1.46e-06	1.13e-06
GOBP_MICROTUBULE_ORGANIZING_CENTER_ORGANIZATION	-0.682176	-1.88704	1.95e-07	1.51e-07
GOBP_NUCLEAR_CHROMOSOME_SEGREGATION	-0.634436	-1.92309	4.12e-09	3.18e-09
GOBP_RNA_3_END_PROCESSING	-0.723529	-1.925	4.9e-08	3.79e-08
GOBP_TRNA_PROCESSING	-0.716602	-1.93044	2.49e-08	1.92e-08
GOBP_MITOCHONDRIAL_TRANSLATION	-0.781144	-1.93572	3.35e-07	2.59e-07
GOBP_CHROMOSOME_SEGREGATION	-0.634971	-1.96139	4.12e-09	3.18e-09
GOBP_RIBOSOMAL_LARGE_SUBUNIT_BIOGENESIS	-0.791943	-1.96936	1.78e-08	1.37e-08
GOBP_MITOCHONDRIAL_GENE_EXPRESSION	-0.752551	-1.97066	6.36e-09	4.91e-09
GOBP_TRNA_METABOLIC_PROCESS	-0.69861	-1.98592	4.12e-09	3.18e-09
GOBP_RNA_SPLICING_VIA_TRANSESTERIFICATION_REACTIONS	-0.649807	-2.00173	4.12e-09	3.18e-09
GOBP_RIBONUCLEOPROTEIN_COMPLEX_SUBUNIT_ORGANIZATION	-0.689658	-2.0036	4.12e-09	3.18e-09
GOBP_CYTOPLASMIC_TRANSLATION	-0.732822	-2.04248	4.12e-09	3.18e-09
GOBP_RNA_SPLICING	-0.651152	-2.09584	4.12e-09	3.18e-09
GOBP_MRNA_PROCESSING	-0.654573	-2.12872	4.12e-09	3.18e-09
GOBP_RRNA_METABOLIC_PROCESS	-0.715146	-2.13417	4.12e-09	3.18e-09
GOBP_NCRNA_METABOLIC_PROCESS	-0.684328	-2.22212	4.12e-09	3.18e-09
GOBP_NCRNA_PROCESSING	-0.716104	-2.25114	4.12e-09	3.18e-09
GOBP_RIBOSOME_BIOGENESIS	-0.740053	-2.2672	4.12e-09	3.18e-09
GOBP_RIBONUCLEOPROTEIN_COMPLEX_BIOGENESIS	-0.719564	-2.31728	4.12e-09	3.18e-09
