# Supplementary material for: Machine learning-based construction of immunogenic cell death-related score for improving prognosis and response to immunotherapy in melanoma
Source: Aging (Albany NY). 2023 Apr 6;15(7):2667–88. doi: 10.18632/aging.204636 (PMC10120887; doi:10.18632/aging.204636)
Supplement: Supplementary Table 2 [file aging-15-204636-s003.xlsx]

## Sheet: Sheet1
Supplementary Table 2. Differentially expressed genes between Cluster A and B in the TCGA-SKCM dataset.
DEGs	logFC	adj.P.Val
IGHM	5.05204	3.84e-60
IGKV4-1	5.02305	7.69e-51
IGHG1	5.01338	3.04e-51
IGKC	4.98617	1.94e-52
IGLV2-14	4.96026	1.47e-53
IGHV3-23	4.78332	8.46e-51
IGHV1-18	4.7148	1.91e-47
IGHG3	4.70264	4.46e-56
IGKV3-20	4.68426	1.22e-47
IGLV3-19	4.65504	3.59e-44
IGLC2	4.63739	1.77e-50
IGLV1-40	4.60197	7.79e-47
IGKV3-11	4.58435	1.29e-48
IGKV1-5	4.57775	5.97e-49
IGLC3	4.56042	2.04e-47
IGHV3-21	4.54115	1.38e-48
IGHV4-39	4.50862	3.09e-47
IGLV1-47	4.49204	1.76e-51
IGLV3-25	4.43603	4.66e-44
IGLV2-23	4.43181	1.24e-47
IGHV3-30	4.41516	2.83e-50
IGHG2	4.39053	9.54e-47
IGHV5-51	4.35964	6.84e-43
IGLV2-11	4.34492	6.1e-49
IGKV3-15	4.3166	2.74e-48
IGJ	4.24619	1.75e-55
IGLV3-1	4.22716	1.52e-45
IGHV3-15	4.2248	1.81e-46
CXCL9	4.2073	9.7e-82
IGLV6-57	4.16501	6.53e-48
IGHGP	4.16469	9.9e-54
IGLV1-44	4.15814	1.16e-44
IGHV4-59	4.13671	3.68e-46
IGLV3-21	4.12757	1.55e-38
IGHV3-33	4.09569	3.67e-47
IGKV1-9	4.09088	3.35e-47
IGHV1-69-2	4.03525	2.37e-43
CXCL13	4.03151	1.54e-82
IGLV3-10	4.02921	9.04e-41
IGLV1-51	4.01762	4.41e-46
NKG7	3.94839	2.56e-115
IGLV4-69	3.93852	1.09e-44
IGHV3-49	3.92484	2.73e-52
IGHA1	3.92168	2.04e-38
IGHG4	3.90259	3.12e-35
IGKV1-17	3.8873	2.4e-43
IGLL5	3.81086	2.03e-45
IGHV4-34	3.78218	7.45e-49
TRBC2	3.77825	9e-111
PLA2G2D	3.75734	3.7e-84
IGKV1-16	3.73727	4.54e-41
IGHV3-11	3.73497	6.06e-40
IGHV1-46	3.70872	4.54e-42
IGHV1-2	3.70486	5.11e-35
CD8A	3.70474	7.95e-115
CD79A	3.70439	5.63e-63
IGHV3-74	3.70207	1.32e-47
CD3D	3.6955	3.41e-118
CCL5	3.6636	7.19e-106
CD3E	3.65505	1.56e-118
MZB1	3.64729	5.85e-66
TRAC	3.6317	1.37e-111
CD2	3.611	1.73e-112
IGLV2-8	3.60645	3.71e-45
IGKV1-27	3.59475	6.52e-42
CCL19	3.59473	1.96e-45
IGHJ3	3.59211	1.26e-42
IGKV1-6	3.56806	1.46e-41
TRBV28	3.54418	2.53e-115
CD27	3.54177	1.79e-123
IGHV3-73	3.54056	4.99e-39
IGHV3-48	3.53486	5.84e-44
IGHV1-24	3.53282	3.78e-34
IGHV4-31	3.5245	2.54e-42
LAG3	3.49747	3.49e-111
OR2I1P	3.48811	7.19e-74
GZMA	3.46311	8.42e-104
CXCL10	3.44895	4.33e-54
UBD	3.40634	1.65e-70
GZMK	3.37604	4.13e-103
IGKV2-24	3.37568	9.39e-40
PRF1	3.35947	2.75e-101
IL2RG	3.35589	9.13e-108
IGLV8-61	3.34062	8.67e-37
CD8B	3.33128	2.15e-121
CD7	3.25523	7.94e-111
PDCD1	3.24047	1.69e-118
IGLV7-43	3.22842	1.13e-43
IGHV2-70	3.22447	1.75e-38
IGHV1-69	3.21765	1.79e-32
CXCR3	3.20735	7.02e-123
IGHV3-53	3.19772	2.17e-42
LCK	3.1898	4.6e-112
IGHV2-26	3.1886	4e-37
IDO1	3.15752	4.04e-67
IGKV2D-29	3.1309	2.57e-40
GBP5	3.12591	7.91e-88
ITGAL	3.12482	1.09e-109
GZMH	3.12453	1.45e-92
SIRPG	3.11497	5.26e-125
HLA-DQA1	3.10816	3.45e-73
SIT1	3.10573	2.75e-113
GZMB	3.08655	4.08e-81
IGHA2	3.01958	2.26e-35
CD52	3.01455	2.76e-76
FAM26F	3.01157	1.12e-78
HLA-DRA	3.00093	1.03e-66
CD74	3.00013	2.43e-80
SLAMF6	2.99772	6.64e-109
GBP4	2.99258	2.41e-60
LTB	2.98882	9.87e-70
TRBV7-9	2.98736	3.75e-97
RARRES3	2.98396	6.74e-70
CTSW	2.97885	3.07e-94
IGLV3-9	2.97354	5.18e-37
HLA-DQA2	2.96373	2.18e-38
CST7	2.94629	2.78e-67
IGHV2-5	2.93597	4.15e-38
IGLV7-46	2.92778	2.9e-43
CORO1A	2.9246	2.23e-90
IKZF3	2.89311	3.17e-102
IGKJ5	2.87803	5.54e-45
IGHJ3P	2.86544	2.64e-42
IGHV4-28	2.86323	3.11e-41
IGHV1-58	2.86302	3.16e-32
IGHV3-13	2.86285	1.16e-41
HLA-DOA	2.8522	6.8e-64
IGKV1-8	2.83283	3.9e-45
C1QB	2.82785	5.65e-68
MIR8071-2	2.81451	1.2e-45
TRBV20-1	2.80996	8.18e-77
HLA-DRB6	2.80286	1.35e-47
HLA-DPA1	2.7989	1.35e-65
IL2RB	2.7977	4.16e-93
IGHV4-61	2.79286	2.08e-36
HLA-DRB1	2.7851	5.84e-66
CXCR2P1	2.78124	6e-76
HLA-DQB1	2.77719	1.08e-66
IGHJ2	2.77655	1.22e-33
IGHV3-66	2.77651	5.04e-38
LYZ	2.77633	5.34e-43
CCL4	2.77628	6.45e-88
CD5	2.77236	1.95e-98
GBP1	2.77088	4.43e-55
HLA-DQB2	2.76418	2.79e-49
PTPRC	2.7581	1.69e-61
IL32	2.75126	1.15e-88
IGLV3-27	2.74955	1.08e-32
SASH3	2.74483	3.11e-87
TIGIT	2.73536	1.07e-108
IGLV5-45	2.73348	4.22e-31
IGLV1-36	2.73332	3.43e-35
CCL21	2.73248	2.53e-17
FDCSP	2.72108	1.28e-17
C1QA	2.70981	1.21e-70
AC092580.4	2.69928	1.85e-84
IGHV3-72	2.68749	3.98e-33
AL122127.2	2.68698	9.01e-45
ADAMDEC1	2.67727	1.5e-56
IGKV3D-20	2.6765	4.31e-34
CD53	2.66395	5.61e-70
RAC2	2.6585	1.28e-64
HLA-DPB1	2.65602	2.29e-76
TRBJ2-7	2.64345	6.25e-68
IGLV9-49	2.63817	4.18e-30
HLA-DRB5	2.63373	2.12e-51
NAPSB	2.63175	9.23e-71
CD48	2.62277	1.94e-68
APOL3	2.60586	5.57e-83
MIR8071-1	2.60212	1.19e-41
SELL	2.58124	2.06e-52
IGKV2-30	2.58098	8.86e-36
SH2D1A	2.56798	4.01e-85
CCR5	2.56297	6.92e-83
SPOCK2	2.56128	1.61e-89
C1QC	2.56118	3.14e-62
CXCL11	2.55134	1.01e-48
AC244250.2	2.55068	4.17e-27
CCR7	2.54986	1.19e-60
IGLC7	2.54614	9.4e-30
CD247	2.54339	3.17e-102
SLA2	2.52135	6.09e-116
PLEK	2.51863	7.31e-66
IGKV2D-40	2.51485	4e-26
SLAMF8	2.50962	1.74e-80
CECR1	2.49868	9.97e-70
IRF1	2.49494	1.15e-87
ITGB2	2.49398	8.22e-68
PTPN6	2.48544	2.23e-87
APOL1	2.48505	3.7e-56
IGHD	2.48424	2.87e-33
CD6	2.4834	4.22e-96
IGHD3-3	2.48183	9.44e-36
AC246787.4	2.48004	9.04e-50
LCP1	2.4781	9.36e-58
IGHV4-4	2.47246	6.7e-32
TRBV29-1	2.47054	1.81e-69
PTPN7	2.46446	2.76e-84
C3	2.46439	3.78e-32
TRBJ2-3	2.46048	9.31e-70
SLAMF7	2.45966	4.31e-41
IL4I1	2.45515	1.55e-64
ANKRD22	2.45115	8.47e-64
TRBV9	2.4481	2.24e-82
AC246787.3	2.44745	3.2e-50
CD3G	2.44552	4.14e-91
CD38	2.44379	1.95e-74
TRBV19	2.44304	1.65e-81
TRBV6-5	2.43928	2.32e-86
RASAL3	2.43551	4.14e-92
TBC1D10C	2.42189	6.8e-88
HCST	2.41789	7.3e-84
TRBV4-2	2.41552	4.6e-74
HLA-DMB	2.40483	2.91e-67
CYTIP	2.40443	3.66e-73
XCL2	2.40389	9.14e-91
POU2AF1	2.3982	3.01e-57
WAS	2.39695	1.39e-84
IGKV6-21	2.39076	1.71e-28
TRBJ2-1	2.38267	1.08e-66
C16orf54	2.37311	1.79e-87
PCED1B	2.37034	2.14e-88
S1PR4	2.36431	5.43e-84
SPN	2.36264	7.88e-83
CXCR6	2.35684	1.67e-90
HCP5	2.35174	2.77e-43
LILRB4	2.35057	4.23e-68
NCF1C	2.34807	2.02e-92
IGLV2-18	2.34577	2.15e-35
IL10RA	2.34278	6.1e-73
ZAP70	2.33747	4.01e-69
GIMAP4	2.33611	8.72e-70
CD37	2.3352	4.94e-71
IGHV4-55	2.32659	5.62e-36
TRAV13-1	2.32509	6.17e-84
IKZF1	2.31887	4.08e-81
IGHV6-1	2.31799	1.1e-36
IGKV3D-11	2.3177	2.79e-43
CYBB	2.31759	4.49e-44
IL12RB1	2.31638	8.87e-92
TRAV12-2	2.31335	7.7e-91
IGLV10-54	2.3129	6.63e-31
IRF8	2.31184	1.36e-60
IGHV3-43	2.31176	6.68e-25
TNFRSF17	2.3094	2.63e-56
IGKV3D-15	2.30491	5.19e-33
APBB1IP	2.30213	1.85e-76
AOAH	2.29727	8.73e-67
HCLS1	2.29526	1.81e-71
ARHGAP30	2.2907	2.71e-71
TRAV21	2.28837	2.06e-77
CARD11	2.28531	2.27e-75
CIITA	2.28491	2.09e-70
HSH2D	2.28278	3.2e-78
VAV1	2.27601	6.08e-81
MS4A1	2.27556	1.24e-33
ARHGAP9	2.27462	4.38e-84
GIMAP7	2.27294	1.21e-55
PCED1B-AS1	2.2669	1.59e-89
USP30-AS1	2.26578	2.4e-97
AL928761.1	2.25893	3.47e-42
SIGLEC10	2.25863	2.36e-72
IGKV1D-16	2.25481	8.5e-31
NCF1	2.25459	1.91e-96
ETV7	2.25324	5.89e-58
IGHV1-3	2.25284	3.34e-28
LAPTM5	2.25149	8.48e-58
IGLV4-60	2.24815	1.97e-23
IGHV3-7	2.24814	6.79e-40
RP11-291B21.2	2.24571	2.33e-74
FASLG	2.24484	4.8e-93
IGKV5-2	2.23508	4.9e-32
CCL4L1	2.23393	9.56e-57
SELPLG	2.23242	3.09e-72
FGL2	2.23122	3.45e-32
FCGR3A	2.23056	1.12e-39
PSMB9	2.22864	1.76e-66
HLA-DMA	2.22592	8.71e-61
NCKAP1L	2.21815	1.2e-71
SNX20	2.21697	1.2e-89
BIN2	2.21168	1.26e-80
TRBV5-1	2.20931	4.35e-74
SERPINA1	2.20679	6.23e-46
P2RY10	2.20148	1.44e-74
EBI3	2.20032	1.06e-68
HLA-DOB	2.19869	3.73e-62
IL21R	2.19643	2.04e-91
CD4	2.19016	1.76e-59
GBP1P1	2.18872	1.67e-51
SECTM1	2.18742	6.3e-60
EVI2B	2.18651	3.05e-57
ACAP1	2.18302	2.15e-84
TRAV19	2.18087	1.62e-75
UBASH3A	2.16887	5.41e-101
GNLY	2.16636	1.35e-53
TNFRSF9	2.16046	8.41e-90
GPR171	2.15841	1.08e-78
LSP1	2.15555	4.26e-66
CD72	2.15281	4.34e-73
TAGAP	2.15273	4.55e-71
C2	2.14507	2.33e-40
AIF1	2.14444	8.5e-59
HLA-B	2.13602	1.69e-47
IL18BP	2.13272	5.34e-80
IFNG	2.13222	3.03e-72
CD79B	2.12902	6.41e-33
CTSS	2.12513	1.65e-51
AC246787.1	2.12451	7.78e-49
IGKV1-12	2.12298	9.43e-36
IGHV3-64	2.12219	2.56e-35
SLA	2.11932	1.88e-70
CD96	2.1185	1.64e-67
ITM2A	2.1171	2.64e-38
INPP5D	2.11547	6.51e-71
HAVCR2	2.11239	1.72e-65
SPI1	2.11028	2.98e-66
IGHV3-20	2.10996	4.43e-30
TYROBP	2.10714	6.75e-62
TMEM176B	2.10529	3.42e-50
CCDC69	2.10366	2.53e-68
CD19	2.10222	5.08e-40
PSTPIP1	2.09767	6.8e-88
MPEG1	2.09117	1.3e-47
DENND2D	2.08753	3.53e-48
FCER1G	2.08591	4.93e-39
DOK2	2.07864	1.3e-65
TRAV12-1	2.07431	1.55e-68
TRBV4-1	2.05637	2.75e-72
SLAMF1	2.05627	8.87e-44
RP11-1094M14.8	2.0545	1.81e-69
AC079767.4	2.04783	4.22e-56
LGALS2	2.04477	1.61e-54
IGKV1OR2-108	2.0443	1.08e-31
SP140	2.04352	1.74e-80
TRAV8-3	2.03367	1.01e-71
MARCO	2.03182	4.96e-23
GBP2	2.03107	1.95e-41
UCP2	2.02808	5.53e-60
IGHD3-9	2.02531	3.02e-32
ZBED2	2.02006	5.79e-76
TNFAIP8L2	2.01922	1.72e-69
TRBJ2-2P	2.01773	1.51e-48
IFI27	2.0144	6.48e-20
TRGC2	2.01392	1.46e-87
PYHIN1	2.01304	1.96e-52
TNFRSF1B	2.00853	1.46e-66
TRAV4	2.00838	5.31e-76
TMC8	2.00775	3.01e-57
LILRB1	2.00768	1.83e-64
SOCS1	2.00766	1.63e-70
LAX1	2.00394	1.9e-66
P2RY8	2.00382	4.71e-65
TBX21	2.00381	1.58e-96
IL18	2.00188	7.77e-56
IGKV1D-8	2.00029	3.85e-33
MAP4K1	1.99746	2.19e-58
TNFSF13B	1.99548	5.44e-34
TRBV10-3	1.99142	8.19e-63
EPSTI1	1.98809	2.86e-49
CSF2RB	1.98719	1.75e-54
IGKV1-39	1.98716	1.63e-32
HCK	1.98609	4.63e-60
ABI3	1.97946	5.97e-75
LST1	1.96984	2.27e-67
SUSD3	1.96573	1.14e-51
RHOH	1.96457	1.27e-70
SEPT1	1.9621	2.86e-73
FTH1P22	1.96173	3.22e-79
PTGDS	1.95644	4.6e-15
CCR2	1.95417	9.61e-64
CRTAM	1.95292	2.76e-84
TRAF3IP3	1.94987	9.77e-70
FCRL3	1.94826	3.34e-63
TRAV12-3	1.94602	4.51e-71
TRBV5-6	1.94523	1.1e-68
IGHJ1	1.94387	1.76e-28
DENND1C	1.94309	1.21e-69
KLHDC7B	1.93552	1.39e-67
ICAM3	1.93076	2.51e-80
TRGV10	1.93063	3.06e-81
RASSF5	1.92907	1.36e-58
LILRB2	1.92816	1.23e-57
SCIMP	1.92599	5.33e-65
LAIR1	1.92567	1.67e-61
SAMSN1	1.92167	5.53e-48
SLC15A3	1.9216	1.99e-49
NCF1B	1.92007	7.3e-84
MYO1G	1.9185	3.16e-77
TRIM22	1.9184	2.95e-41
IL7R	1.9172	4.92e-37
CD86	1.91709	2.88e-58
TRBV6-1	1.91684	6.9e-66
RCSD1	1.91454	5.74e-49
TRBV2	1.91404	9.47e-72
MS4A6A	1.9113	3.59e-46
ITK	1.91023	1.05e-69
ATP2A3	1.90653	2.47e-41
DOCK2	1.90513	4.14e-58
GPR174	1.90252	3.76e-55
TOX	1.90064	1.13e-51
TAP1	1.89602	8.14e-49
MYO1F	1.89337	1.2e-74
FCGR1A	1.89178	5.73e-60
SERPING1	1.89132	4.51e-41
CLEC10A	1.89006	2.12e-42
TRBV3-1	1.88716	5.64e-70
ICOS	1.88544	1.63e-70
TMSB4X	1.88047	2.75e-50
TRAV2	1.87985	2.25e-73
NCF4	1.87816	5.43e-62
IGKV3OR2-268	1.87725	4.49e-40
TCL1A	1.87433	5.98e-29
IGKV3-7	1.87433	7.2e-35
LY86	1.86874	1.59e-53
HLA-F	1.86844	2.45e-47
CD69	1.86826	1.01e-47
VPREB3	1.86274	1.5e-28
SIGLEC1	1.86141	3.59e-56
MIR4539	1.86125	2.15e-42
PTAFR	1.86078	8.04e-58
TRAV8-6	1.8603	1.28e-74
GMFG	1.85986	8.51e-50
TRAV17	1.85907	2.07e-79
TMEM176A	1.85856	2.05e-48
TESPA1	1.8562	6.56e-75
IGSF6	1.85391	6.12e-54
C1orf162	1.85185	2.59e-65
BIRC3	1.85165	1.83e-29
FMNL1	1.85129	8.94e-57
LGALS9	1.85112	1.61e-53
FBP1	1.84485	4.15e-39
RP5-1171I10.5	1.84433	3.15e-54
CCL8	1.84085	9.91e-35
GIMAP6	1.84	1.37e-54
BATF	1.83854	1.86e-38
TRAT1	1.83763	3.3e-68
MMP9	1.83539	6.17e-17
AIM2	1.83308	5.08e-20
TNFSF10	1.83161	5.56e-36
TRAV3	1.82926	3.02e-68
ARHGAP25	1.82648	1.44e-53
PRKCB	1.82274	3.14e-42
TRBV11-2	1.82253	1.41e-69
CD84	1.81926	2.95e-55
SKAP1	1.81889	1.11e-29
SIGLEC14	1.81762	1.54e-49
CCL3	1.81685	7.65e-44
PPP1R16B	1.81606	2.07e-42
PIK3AP1	1.81365	2.53e-42
CYTH4	1.81358	1.1e-63
JAK3	1.81073	4.49e-52
CSF1R	1.80357	6.89e-37
VCAM1	1.79959	1.01e-34
P2RY13	1.79808	2.16e-57
TRBV12-4	1.79758	1.41e-59
TRAV8-2	1.79603	9.65e-78
GZMM	1.79543	1.88e-31
PDCD1LG2	1.7946	3.55e-49
IGHD3-22	1.79214	4.55e-32
APOL6	1.79012	8.26e-42
CCND2	1.78952	8.92e-43
PARVG	1.78622	4.47e-72
NFAM1	1.78342	2.49e-65
FGR	1.78023	5.59e-60
TRBV18	1.77974	1.76e-67
CR2	1.77531	2.34e-20
TRAV14DV4	1.77498	3.16e-75
FGD3	1.76521	4.18e-67
RNASE6	1.76475	1.95e-46
MNDA	1.76379	1.03e-40
FYB	1.75981	3.21e-32
TRBV25-1	1.7559	5.41e-80
CD300LF	1.75483	8.35e-65
APOL4	1.75429	1.05e-51
TRAV9-2	1.75325	1.1e-63
ZBP1	1.75234	3.02e-81
TRBV6-6	1.75009	2.52e-62
IGKV1D-13	1.74915	8.52e-19
LTA	1.74826	1.2e-72
IGHV1OR15-2	1.74567	1.65e-30
SIGLEC8	1.74505	2.08e-59
APOBEC3G	1.74111	4.54e-41
CXCR4	1.74039	2.97e-33
MFNG	1.7394	4.14e-58
DEF6	1.73743	4.7e-49
AMICA1	1.73644	7.18e-65
ALOX5	1.73537	1.85e-45
ACSL5	1.73422	3.04e-39
WDFY4	1.73416	1.44e-59
hsa-mir-4538	1.72928	1.19e-39
CLU	1.72819	7.8e-14
GCH1	1.72581	8.02e-52
PIM2	1.72577	3.34e-51
TOX2	1.72139	4.76e-39
DERL3	1.72092	5.62e-36
TNFRSF18	1.72073	7.92e-54
C1S	1.71038	3.46e-28
TRBJ2-2	1.7103	4.5e-46
NLRC5	1.70894	5.02e-58
NCF2	1.70883	3.64e-48
SPIB	1.70853	9.56e-42
ARHGDIB	1.70288	2.67e-43
ITGB7	1.70058	4.35e-63
HK3	1.7003	3.36e-47
CD14	1.6998	6.24e-34
CHIT1	1.69943	4.97e-21
MIR155HG	1.69856	2.26e-41
TRAV29DV5	1.69417	2.18e-66
IGKV2-29	1.69384	6.38e-21
FAM46C	1.69307	4.37e-30
VSIG4	1.6929	6e-27
TLR8	1.69121	3.23e-53
CD40	1.68738	2.63e-39
IL15RA	1.68401	2.39e-66
ITGB2-AS1	1.68391	7.54e-54
IGLV1-41	1.6794	5.91e-21
PILRA	1.67838	2.57e-54
VNN2	1.67712	8.62e-56
IGHV5-78	1.67635	5.38e-33
GIMAP1	1.67585	1.14e-66
HLA-DQB1-AS1	1.67567	1.03e-38
PTPN22	1.67487	1.78e-52
PRKCQ	1.67408	1.67e-60
BCL11B	1.67306	1.94e-55
AC006129.2	1.67266	2.86e-45
GPR114	1.66663	1.27e-65
TRBV7-6	1.66108	7.03e-67
CD274	1.65941	6.95e-44
FPR3	1.65419	3.59e-32
TRAV8-4	1.64991	2.69e-68
TRAV5	1.64967	6.59e-61
IGHV1-12	1.64874	1.08e-23
OASL	1.64805	4.68e-34
CMKLR1	1.64717	1.18e-40
CHI3L1	1.64687	2.86e-13
MIR4537	1.64666	3.45e-39
LRRC25	1.6465	2.9e-47
RAB37	1.64472	9.71e-63
TRBV5-4	1.64458	5.23e-63
HLA-C	1.64382	3.61e-36
PSD4	1.64294	4.78e-54
FGD2	1.64263	1.34e-69
HSD11B1	1.63892	7.28e-36
CD163	1.63759	1.25e-24
SLC7A7	1.63662	1.09e-54
CXCL12	1.63635	1.01e-28
IGLC6	1.63525	5.08e-40
FOXP3	1.63471	8.83e-60
TRAV1-2	1.63377	7.67e-68
GATA3	1.63201	4.54e-44
CLEC4E	1.63115	2.19e-55
HLA-DPB2	1.63064	4.22e-39
BLNK	1.62879	2.57e-50
NCR3	1.62618	2.72e-59
RLTPR	1.62606	2.11e-58
SH2D2A	1.62244	9.17e-48
TMSB4XP8	1.62009	1.16e-25
UBA7	1.61996	1.31e-35
JAKMIP1	1.61896	1.52e-82
IGHD2-2	1.61858	6.68e-24
IGLV3-16	1.61741	1.25e-25
TRBV27	1.61552	3.63e-68
TYMP	1.61511	2.82e-37
GIMAP2	1.61498	1.27e-33
DOCK8	1.61477	5.28e-42
IL2RA	1.61296	3.08e-38
KIR2DL4	1.61129	6.18e-62
PLA2G7	1.61008	2.58e-29
TRBV13	1.60935	7.65e-56
STAP1	1.60413	4.25e-40
IGHV3OR16-9	1.60334	4.24e-34
TNFAIP2	1.59974	4.92e-45
AKNA	1.59209	5.89e-53
LCP2	1.58948	6.45e-31
CCDC88B	1.5863	9.12e-61
C10orf54	1.58549	4.37e-46
SRGN	1.5849	1.05e-26
TRAV13-2	1.58464	1.07e-66
SERPINB9	1.58407	6.87e-22
GNGT2	1.58394	5.94e-83
CD180	1.58072	1.14e-47
STAT1	1.58067	2.87e-33
BTK	1.58	2.47e-45
LRMP	1.576	1.9e-43
SLCO2B1	1.57553	2.27e-33
CEBPA	1.57499	1.21e-39
IGKV2-28	1.57196	8.82e-22
PRDM1	1.57081	2.52e-46
DAPP1	1.56968	1.95e-50
FCER2	1.56198	1.78e-22
GPR18	1.559	2.09e-51
UBE2L6	1.55872	7.79e-40
RBP5	1.55851	1.71e-25
FAIM3	1.55492	7.49e-17
OAS2	1.55336	4.11e-23
POU2F2	1.55252	7.16e-44
TIMD4	1.55228	8.95e-43
IGLJ2	1.54539	8.43e-35
SYK	1.54536	1.8e-28
SEMA4A	1.54481	1.65e-58
XCL1	1.54009	5.83e-65
GPR183	1.53882	1.79e-25
GPR65	1.53499	1.12e-50
TMEM150B	1.53458	1.49e-54
KLRB1	1.53432	5.04e-52
TRAV16	1.53105	6.27e-62
THEMIS	1.52835	8.79e-61
PSMB8-AS1	1.52755	6.15e-38
ALOX5AP	1.52497	5.54e-26
GVINP1	1.52093	5.19e-48
RASGRP1	1.5181	1.66e-42
MS4A4A	1.51681	3.47e-34
RASSF4	1.51219	3.37e-41
CD300A	1.5107	1.55e-39
IGHD6-25	1.50961	4.9e-22
GIMAP8	1.50209	7.49e-42
TMEM156	1.50078	4.63e-55
TRBV30	1.50049	7.43e-46
CTLA4	1.49763	1.16e-21
B2M	1.49384	6.17e-34
IGHV1-67	1.49305	4.68e-27
CEACAM21	1.49205	5.97e-43
ZNF683	1.49068	6.3e-55
IGKV1D-12	1.49036	1.71e-27
TRBV7-3	1.48963	1.08e-48
CCL2	1.4894	1.45e-22
C3AR1	1.48882	6e-30
IFITM1	1.48793	7.5e-19
CLEC7A	1.48664	7.63e-42
FERMT3	1.48512	7.57e-22
NLRC3	1.48181	3.09e-55
ALDH2	1.48161	2.12e-27
TRDC	1.48062	1.22e-41
ASCL2	1.47967	3.54e-67
RASGRP2	1.47106	3.06e-35
FCN1	1.46878	1.88e-33
RP11-284N8.3	1.46737	4.15e-39
DOK3	1.46719	1.41e-46
FCRL6	1.46521	3.24e-65
PIK3R5	1.46464	2.74e-55
STX11	1.46325	2.92e-36
AC133644.2	1.46289	4.8e-71
GPR132	1.46108	4.9e-52
PSMB10	1.45976	5.56e-55
TRAV24	1.45588	7.31e-57
LAMP3	1.45285	4.16e-35
BASP1	1.45241	3.26e-29
APOBR	1.45212	1.05e-49
CD5L	1.45075	8.31e-26
LY9	1.4506	1.78e-67
SAMHD1	1.44949	3.55e-26
PLAC8	1.44734	8.31e-37
LAT2	1.44608	2.56e-42
HVCN1	1.44279	3.13e-38
BTLA	1.4411	7.25e-51
BATF2	1.44023	1.12e-29
PTGER4	1.44014	2.87e-35
RP5-1028K7.2	1.43892	6.88e-36
TRAV41	1.43885	1.46e-50
WARS	1.43857	4.05e-26
C1R	1.43713	1.32e-23
EMB	1.43605	8.83e-22
IGHV3-71	1.43498	3.96e-32
PARP15	1.4313	9.79e-41
FCRL5	1.43012	7.87e-43
AC103563.5	1.42882	1.93e-25
IGKV1D-39	1.42683	9.47e-20
SEMA4D	1.42653	9.57e-45
SAMD9L	1.42524	6.5e-21
RP4-647J21.1	1.42398	5.24e-65
TUBA4A	1.42191	2.11e-18
RP11-1094M14.5	1.41647	1.3e-51
PNOC	1.41191	5.25e-43
P2RY6	1.4112	1.02e-62
SYTL1	1.40647	1.67e-35
BST2	1.40538	1.64e-16
RP11-16E12.2	1.4001	7.93e-41
SOWAHD	1.3928	4.17e-66
TLR7	1.39248	1.39e-39
HNRNPA1P21	1.39231	4.12e-51
DUSP2	1.39219	4.17e-33
STAT4	1.3912	2.04e-53
GP1BA	1.38981	2.25e-25
CLIC2	1.38881	4.52e-21
LLNLR-470E3.1	1.38844	3.77e-43
SYTL3	1.38743	1.68e-48
HLA-E	1.38595	1.91e-44
APOBEC3H	1.3842	3.43e-49
OSCAR	1.38217	1.25e-34
LYN	1.38117	9.4e-34
HLA-H	1.38095	1.02e-26
UNC13D	1.38074	8.5e-29
CCR1	1.37825	5.08e-26
VAMP8	1.37714	8.31e-23
C7	1.37649	2.5e-09
IGHV1OR15-9	1.37471	9.45e-24
CXorf21	1.37429	1.69e-42
LILRA4	1.37015	1.89e-39
RP11-23J18.1	1.36949	2.77e-60
PIK3CG	1.36895	5.24e-33
GFI1	1.36476	2.64e-36
IFI44L	1.36468	2.71e-16
RARRES1	1.36356	3.92e-18
SIGLEC7	1.36113	5.32e-42
NUAK2	1.36041	2.86e-40
TRAV26-2	1.36021	6.41e-58
RP11-294C11.2	1.35769	6.59e-27
ACKR1	1.35741	9.13e-13
SQRDL	1.35563	4.22e-30
C19orf38	1.3536	1.26e-48
CD40LG	1.35322	1.11e-39
VAMP5	1.35155	5.76e-25
ERAP2	1.35	3.34e-12
PTK2B	1.34962	8.47e-51
TRBV15	1.34952	1.57e-58
BANK1	1.34728	1.43e-26
TRAV20	1.34694	8.54e-52
EOMES	1.3457	2.13e-22
TRAV26-1	1.34135	2.54e-60
RP11-493L12.6	1.34023	1.26e-55
IGKV6D-21	1.33935	1.26e-17
IGLV5-37	1.33874	1.22e-20
CD244	1.33631	1.78e-46
JSRP1	1.33483	2.52e-31
APOBEC3D	1.33317	2.72e-37
ISG15	1.33134	1.07e-15
LINC00861	1.33102	7.31e-42
PAX5	1.32928	7.47e-24
RP5-1091N2.9	1.32742	3.33e-65
RP11-876N24.3	1.32682	3.06e-35
RP11-1166P10.8	1.32607	1.69e-31
OAS1	1.32488	1.6e-20
SEL1L3	1.32317	6.01e-15
AC246787.5	1.32294	6.65e-35
MEI1	1.32153	7.21e-51
CCRL2	1.31997	4.69e-59
TREM2	1.3192	1.08e-20
TSTD1	1.31913	5.76e-13
IGHV1-45	1.31865	1.08e-20
IGKV1D-17	1.30885	4.18e-18
SEPT6	1.30637	5.34e-30
DBH-AS1	1.30177	2.37e-42
LY75	1.29971	8.78e-50
C15orf48	1.29835	1.58e-21
CAPG	1.29768	3.02e-08
KCNA3	1.29756	1.62e-43
ADAP2	1.29618	9.46e-34
FPR1	1.29354	3.61e-24
TNFSF8	1.2934	3.26e-43
CLEC4A	1.29017	7.48e-36
HLA-A	1.2899	4.99e-28
GBP3	1.28976	4.47e-17
IGLV3-12	1.2891	1.85e-24
PARP12	1.28811	4.53e-31
GGTA1P	1.2873	2.42e-37
TFEC	1.28708	1.78e-41
AC010518.2	1.28697	1.32e-15
FAM105A	1.28458	2.61e-24
STAC3	1.28333	2.64e-56
SLC38A1	1.28318	1.46e-11
SLC2A5	1.28305	1.2e-28
IGHV3OR16-13	1.28202	8.48e-28
TNFAIP8	1.28164	2.75e-36
CD1C	1.2814	6.41e-24
CD300C	1.28068	7.97e-38
ADAM8	1.2802	4.4e-23
LIMD2	1.27749	1.5e-26
RP11-848P1.3	1.27684	6.57e-35
KLHL6	1.27576	7.5e-27
LPAR5	1.27527	1.67e-39
BLK	1.27484	6.06e-27
SMCO4	1.27328	6.71e-36
VOPP1	1.27305	1.17e-24
APOC1	1.27283	2.62e-11
IGKV1OR2-6	1.27278	1.18e-26
CSF1	1.27271	4.7e-26
TNF	1.26957	2.17e-42
CSF3R	1.26861	2.71e-42
RP11-493L12.5	1.26699	1.17e-62
MIR5195	1.26641	8.97e-24
CCDC88C	1.26564	1.33e-37
BANCR	1.26129	0.000264866
TRAV23DV6	1.2611	2.41e-55
HMHA1	1.26097	3.5e-34
DPT	1.26006	3.93e-11
C10orf128	1.25905	8.55e-42
CCL3L3	1.25778	1.53e-31
IGKV2OR22-4	1.25754	4.52e-23
TLR10	1.25746	9.43e-31
RARRES2	1.25711	5.19e-16
FOLR2	1.25697	2.67e-19
TRAV8-1	1.25523	1.41e-54
PIK3IP1	1.25521	4.69e-30
ITGAX	1.25495	2.95e-31
AL928768.3	1.2545	3.65e-28
CFD	1.25381	2.84e-19
IGHD3-10	1.25348	5.84e-17
TRAV22	1.25331	3.24e-49
RP11-598F7.3	1.25287	8.33e-48
ITGAM	1.24958	7.99e-28
TOMM20P2	1.24937	1.44e-47
MX1	1.24768	4.56e-13
PSTPIP2	1.24764	4.14e-33
PSMB8	1.24698	5.13e-31
MAN1A1	1.24687	1.28e-18
CCR4	1.24622	1e-41
MS4A7	1.24614	4.99e-21
TRANK1	1.24539	7.66e-31
SLC40A1	1.24508	1.01e-12
TRAV27	1.24488	4.92e-57
IGLJ1	1.24434	2.7e-32
CLIC3	1.24329	7.14e-17
SIGLEC9	1.24312	3.02e-40
CCL22	1.24292	4.45e-27
RP11-47L3.1	1.23922	2.03e-61
RSAD2	1.23815	2.09e-17
PARP14	1.23728	5.07e-24
TRBV14	1.23159	2.27e-50
TRBV12-3	1.22899	1.03e-51
TRDV1	1.22722	2.35e-46
DPEP2	1.22664	4.07e-50
IGHV3-63	1.22322	1.12e-23
CCDC64	1.22286	1.1e-21
XCR1	1.22172	6.37e-56
TRAV35	1.21752	1.96e-57
FLI1	1.21518	2.02e-30
CTA-384D8.31	1.21331	4.29e-19
CD28	1.21315	4.72e-31
IGHV3OR16-8	1.21264	2.7e-25
TRBV24-1	1.21107	1.74e-27
ANO9	1.21051	1.01e-27
MIAT	1.21031	1.31e-37
RP11-686D22.10	1.2101	1.64e-39
TGM2	1.20864	3.62e-17
MAFB	1.20641	3.69e-23
HLA-G	1.20402	1.72e-12
BTG2	1.20157	3.61e-27
IGKV1-33	1.20083	1.91e-17
ICAM2	1.20011	9.06e-40
CLEC12A	1.19951	1.77e-36
ST8SIA4	1.19792	3.62e-27
LILRA5	1.19784	1.01e-27
ADAM28	1.19709	6.34e-36
IGKV2D-24	1.19654	3.16e-20
HLA-DRB9	1.19638	2.49e-26
PLA1A	1.19411	7.07e-05
DNASE1L3	1.19116	5.9e-22
IGHV3-19	1.191	2.92e-22
PIK3R6	1.1901	8.59e-43
RP11-1399P15.1	1.18956	3.87e-48
TRAV36DV7	1.18748	2.54e-53
BTN3A3	1.18594	4.76e-29
SPINT2	1.18321	1.53e-19
FBXO6	1.18106	1.32e-32
TNFRSF4	1.18021	8.62e-21
CD209	1.17974	5.09e-20
IGHV3OR15-7	1.17904	4.34e-26
HAPLN3	1.17845	1.67e-25
ZNF831	1.17825	1.61e-47
CFP	1.17496	1.4e-32
CXCL16	1.17439	2.27e-24
PLD4	1.17283	2.84e-36
ELMO1	1.17178	8.46e-23
CD70	1.17146	1.56e-15
MYO7A	1.17018	5.26e-28
GADD45G	1.16838	7.21e-22
IGKV2D-30	1.16787	1.43e-19
MMP12	1.16677	1.58e-09
RP11-170L3.7	1.16628	2.73e-27
CETP	1.16531	1.09e-12
ACY3	1.1624	9.02e-28
GPR68	1.15969	1.36e-22
RFTN1	1.15829	1.15e-25
IRF5	1.15807	1.68e-34
CLECL1	1.15677	1.63e-48
RP11-10J5.1	1.15466	5.82e-52
CTA-384D8.35	1.15403	1.05e-40
AP002954.4	1.15383	3.34e-41
RP11-405M12.4	1.15323	3.31e-53
IGLV2-34	1.15167	5.69e-24
RP11-93B14.9	1.15068	9.77e-42
AIM1	1.1495	4.14e-14
NUGGC	1.1494	3.99e-42
RIPK3	1.14805	4.56e-36
PLCB2	1.14802	4.32e-21
EVL	1.14676	1.38e-29
NOD2	1.14558	2.53e-33
GAB3	1.14461	6.14e-43
MSR1	1.14348	1.37e-16
RAB20	1.14322	4.98e-18
IL34	1.1411	4.26e-23
TMEM37	1.14062	7.27e-30
ABCG1	1.14011	4.74e-22
HCG4P7	1.13997	2.38e-17
CRIP1	1.13988	1.39e-44
XAF1	1.13928	7.42e-19
GNA15	1.13573	5.91e-21
RP11-295P22.2	1.13438	6.8e-25
TRAV6	1.13378	8.86e-47
EAF2	1.13115	1.43e-28
AKAP5	1.13094	6.98e-42
LBH	1.12834	3.46e-19
CD1D	1.12824	4.79e-28
CASP1	1.12786	4.46e-11
SLC9A9	1.12713	1.02e-28
IFI35	1.12678	2.62e-23
TRBJ2-4	1.12678	1.39e-31
AC104699.1	1.12581	4.7e-34
ZC3H12D	1.12529	8.6e-56
TRAV25	1.12511	2.74e-48
IGHV3-35	1.125	3.28e-24
RP11-455F5.5	1.12293	1.22e-49
ODF3B	1.12184	2.17e-27
RP11-222K16.2	1.11945	3.67e-29
IPCEF1	1.11741	1.84e-49
GALM	1.1166	2.79e-18
RNASET2	1.11542	2.29e-35
TRBV5-5	1.11502	1.83e-37
ISG20	1.11465	1.7e-13
AGAP2	1.11024	6.04e-32
GPR84	1.11012	3.44e-24
IGKV1D-43	1.10851	4.79e-21
MRC1	1.10722	3.98e-13
SIRPB2	1.10621	1.99e-43
SH2D3C	1.10616	2.65e-33
P2RX1	1.10461	9.04e-44
ARL11	1.10444	3.99e-50
FCRL1	1.10357	1.92e-21
PLCG2	1.10253	1.16e-29
FCHO1	1.10226	7.99e-28
SIRPB1	1.09973	1.14e-42
ARHGAP4	1.09801	8.66e-18
PTGER2	1.09738	7.07e-39
RP11-325F22.2	1.09706	3.47e-51
TRAV39	1.09591	5.06e-46
PRAM1	1.09485	7.4e-44
TNFRSF13C	1.09261	6.08e-17
SLFN11	1.09148	7.83e-14
P2RX5	1.09123	3.7e-24
C11orf21	1.08976	1.29e-40
IGKV1-13	1.0872	1.34e-16
AP003774.1	1.08567	1.03e-55
HTRA4	1.08544	4.71e-46
TMEM119	1.08543	2.79e-12
ARHGAP15	1.08436	3.93e-17
CHI3L2	1.08379	2.79e-12
PRR33	1.08335	9.94e-43
RP11-1334A24.6	1.08253	7.26e-32
SLC38A5	1.08184	3.06e-18
STK17B	1.08149	3.61e-15
TNFRSF13B	1.08128	2.75e-34
TRG-AS1	1.08119	3.19e-30
BHLHA15	1.07964	1.83e-21
HAMP	1.07892	9.73e-21
DNAJC5B	1.07865	7.28e-46
IGHD4-17	1.07839	7.14e-16
IGHD2-15	1.078	3.87e-15
ZBED6CL	1.07661	1.34e-11
GAPT	1.07652	5.24e-27
IFIT3	1.07637	1.77e-13
TRAV10	1.07603	2.81e-47
FAM49A	1.0758	4.41e-21
ZBTB32	1.07546	2.06e-52
RP11-326C3.2	1.07518	5.85e-20
LMO2	1.07454	1.18e-24
TRGV7	1.07399	6.41e-42
IGHV3-52	1.0727	9.38e-26
RP11-812E19.9	1.07253	3.28e-23
RP4-742C19.12	1.06925	9.9e-56
CTD-2020K17.1	1.06923	2.7e-32
RP11-24F11.2	1.06652	2.41e-44
LGALS17A	1.06314	1.25e-30
LINC01215	1.0603	2.66e-26
LRRC61	1.0593	3.75e-09
TRAJ1	1.05622	1.74e-30
TIFAB	1.05495	8.05e-63
TRPM2	1.05471	7.46e-19
TAP2	1.05324	2.84e-24
TRAV38-1	1.05203	2.78e-47
CTD-2547L24.3	1.05141	2.83e-61
SLFN12L	1.05133	1.3e-48
THEMIS2	1.04962	3.1e-20
HMOX1	1.04937	2.18e-16
IL33	1.04819	6.99e-09
RNASE2	1.04621	1.42e-20
PIM1	1.046	6.92e-26
MATK	1.04599	4.74e-21
KIAA0125	1.04587	1.73e-34
CBFA2T3	1.04536	2.86e-25
CAMK1D	1.04532	1.08e-25
SNAI3	1.04438	4.92e-48
KCNJ10	1.04372	2.01e-06
DHRS3	1.04364	2.43e-12
PLEKHO1	1.04352	2.99e-24
CCL18	1.04315	1.99e-06
DPYD	1.04099	3.04e-12
CD22	1.04079	9.11e-08
FUT7	1.04069	8.63e-48
RP11-219E7.1	1.04018	1.24e-29
KLRD1	1.04006	1.5e-56
BTN3A1	1.03867	5.87e-21
CSF2RA	1.03765	5.27e-11
IGHV1OR21-1	1.03597	5.26e-22
IGHD3-16	1.03162	2.23e-18
LILRB3	1.02658	3.21e-47
MILR1	1.0254	2.51e-16
EMR1	1.02472	2.17e-37
RP11-44K6.2	1.02458	6.96e-23
MMP25	1.02373	2.41e-30
PSME2	1.02207	5.1e-47
RN7SL138P	1.02189	1.73e-28
OLR1	1.02099	7.99e-12
IGLV1-50	1.02032	2.87e-21
EVI2A	1.01845	1.14e-10
GIMAP5	1.01749	1.1e-48
REC8	1.01675	1.42e-32
IGHV3-60	1.01537	8.47e-27
GLIPR2	1.01488	8.26e-22
RP11-750H9.5	1.01266	8.15e-28
TNFAIP3	1.01209	6.68e-15
TRAV1-1	1.00972	1.76e-42
RP4-728D4.2	1.00855	7.32e-53
EFEMP1	1.00803	1.85e-10
TCF7	1.00748	6.78e-16
CP	1.00724	4.35e-19
TLR4	1.00668	2.25e-13
ANXA2R	1.00647	2.19e-36
SELP	1.0061	2.65e-15
FAM107B	1.00504	3.15e-14
TLR2	1.00452	8.52e-14
CHST15	1.0043	3.94e-22
AC011899.9	1.00421	1.21e-42
CMPK2	1.0041	1.48e-15
MFAP4	1.00383	3.77e-07
PECAM1	1.00171	1.79e-21
CYTL1	-1.01659	0.000294739
KRT14	-1.03085	0.0250516
BCHE	-1.17634	3.42e-07
