# Supplementary material for: Machine learning-based construction of immunogenic cell death-related score for improving prognosis and response to immunotherapy in melanoma
Source: Aging (Albany NY). 2023 Apr 6;15(7):2667–88. doi: 10.18632/aging.204636 (PMC10120887; doi:10.18632/aging.204636)
Supplement: Supplementary Table 4 [file aging-15-204636-s005.xlsx]

## Sheet: Sheet1
Supplementary Table 4. Previously published mRNA signatures.
PMID	Author_year	Symbol	signature
23052696	Brunner_2013	DCD,ECRG2 ,HES6,KBTBD10,COL6A6,PIP ,SCGB1D2,KRT9	risk score=0.84*DCD+0.62*ECRG2+0.37*HES6+0.64*KBTBD10+0.42*COL6A6-0.06*PIP-0.71*SCGB1D2+0.35*SCGB2A2+1.02*KRT9
32731180	Tian_2020	BATF2 ,CTLA4 ,EGFR,HLA-DQB1,IKBKG , PIK3R2 ,PPP3CA	risk score=-0.147*BATF2-0.135*CTLA4+0.283*EGFR-0.168*HLA-DQB1-0.560*IKBKG+0.773*PIK3R2-0.399*PPP3CA
32908921	Liu_2020-1	FCRL1,FCRL2,FCRL3,FCRL4,FCRL5,FCRL6	risk score=0.276*FCRL1-0.356* FCRL2-0.097* FCRL3+0.5*FCRL4-0.208*FCRL5-0.453*FCRL6
33005180	Liu_2020-2	S100A12,CCRL2,CD86,IL21R,CCR4,FCGR3A,KLRD1,IL18RAP,IL2RB,CCL8	risk score=0.182*S100A12+0.390*CCRL2-0.587*CD86-0.2 90*IL21R+0.199*CCR4+0.375*FCGR3A-0.350*KLRD1-0.147*IL18RAP+0.460*IL2RB-0.211*CCL8
33072607	Kang_2020	IFNG,BIRC5	risk score=-0.13914*IFNG+0.21596*BIRC5
33168410	Hu_2020	IFITM1,TNFSF13B,CCL8,APO-BEC3G,KLRK1	risk score=-0.0020*IFITM1+0.0171*TNFSF13B+0.0506*CCL8+0.0369*APO-BEC3G+0.4690*KLRK1
33178596	Mei_2020	MTMR14,BATF2,ME1,URI1,ITGB1BP1,DNM2,EXOC6,OSCP1,ING2,ZNF83	risk score=11.154*MTMR14+4.800*BATF2-61.790*ME1-8.157*URI1-56.070*ITGB1BP1-7.986*DNM2+5.652*EXOC6-33.112*OSCP1-3.577*ING2-4.202*ZNF83
33194647	Luo_2020	STPG1,HMCES,ANXA2P2,CA12,RNF208,SLC44A3,TCTN1,POMGNT2,ULBP1,SIRT3	risk score=-0.150605911*STPG1-0.526265796*HMCES+0.017480411*ANXA2P2+0.414736428*CA12-0.098017226*RNF208-0.175213008*SLC44A3-0.171507956*TCTN1-0.106148114*POMGNT2+ 0.037591702*ULBP1-2.002826257*SIRT3
33367533	Hou_2021	AZGP1,BAI1,CCDC74A,FUT3 ,PLCD1,S100A4,SCN8A,SEMA3B,SLC25A38,SLC44A3	risk score=-0.0096420*AZGP1+0.0227310*BAI1+0.0584049*CCDC74A-0.2563306*FUT3+0.0124631*PLCD1+ 0.0005874*S100A4-0.3786607*SCN8A-0.0132431*SEMA3B-0.0333145*SLC25A38-0.0645225*SLC44A3
33428606	Zeng_2021-1	CYTL1,CCL8,FCGR2C,OAS1,HAPLN3,WIPF1,CLIC2	risk score=0.007*CYTL1-0.033*CCL8-0.021*FCGR2C-0.015*OAS1-0.037*HAPLN3-0.014*WIPF1-0.023*CLIC2
33540700	Luo_2021	STEAP3,MAP1LC3C,ITGA6,HMOX1,CD44,ALOX12,AIFM2/FSP1	risk score=0.055060532*STEAP3-0.202884346*MAP1LC3C+ 0.34461317*ITGA6+0.125266141*HMOX1-0.316011897*CD44-1.311120914*ALOX12+0.710789029*AIFM2/FSP1
27141884	Jiang_2016	PIK3R2,GATAD2A,TRIM32,NUP188,LAPTM4B,ZDHHC13,PARP9,NXT2,MDP1	risk score=0.025*PIK3R2+0.057*GATAD2A+0.018*TRIM32+0.051*NUP188+0.009*LAPTM4B-0.096*ZDHHC13-0.008*PARP9-0.041*NXT2-0.006*MDP1
33585219	Zhang_2021-1	IGHV1-18,CXCL11,LTF,HLA-DQB1	risk score=-0.000600085*IGHV1-18-0.032242183*CXCL11+0.003776394*LTF-0.007893899*HLA-DQB1
33624645	Shou_2021	FBP1,SDC3,FOXO3,IGFBP1,S100A4,EGFR,ISG20,CP,PPARGC1A,KIF5A,DPYSL4	risk score=0.007594 *FBP1-0.159941*SDC3+0.196352 *FOXO3-0.189419*IGFBP1-0.091917*S100A4+0.177252*EGFR-0.140713*ISG20-0.039437*CP+ 0.079128*PPARGC1A-0.056284*KIF5A+0.048087*DPYSL4
33682883	Zheng_2021	TUSC1,LMCD1,GABARAPL1,PRKCD,DLC1,FKBP1A,ITGA6,BNIP1,IKBKE	risk score=-0.0606*TUSC1-0.0480*LMCD1-0.0411*GABARAPL1-0.0319*PRKCD-0.0146*DLC1+0.0035*FKBP1A+0.09308*ITGA6+0.1349*BNIP1+0.1870*IKBKE
33688507	Song_2021	INHA,NDRG1,FITM1,LHB,GBP2,CCL8	risk score=-0.0033*INHA-0.0145*NDRG1-0.0030*IFITM1+ 0.0264*LHB-0.0647*GBP2-0.0677*CCL8
33753855	Mei_2021	SEL1L3,HAPLN3,BST2,IFITM1	risk score=-0.06359*SEL1L3-0.05602*HAPLN3-0.0023*BST2-0.00263*IFITM1
33877656	Ren_2021	MMP2,STK25,TUFM,C4B,EGFR,CARS2,ACOX2,GLE1,MGST1,CALM2,UBQLN4,A2M,FAS	risk score=0.0206*MMP2+0.0905*STK25+0.1915*TUFM-0.1790*C4B+0.2453*EGFR+0.2199*CARS2-0.0972*ACOX2+0.3325*GLE1+0.0487*MGST1-0.0474*CALM2+0.1726*UBQLN4-0.0329*A2M-0.10678*FAS
34032721	Wang_2021	IL15,CCL8 ,CLIC2 ,SAMD9L ,TLR2 ,HLA.DQB1,IGHV1-18 ,GBP4 ,RARRES3 ,APOBEC3G	risk score=-0.03884*IL15-0.00036*CCL8-0.00245*CLIC2-0.00833*SAMD9L-0.01267*TLR2-0.00028*HLA.DQB1-0.00014*IGHV1-18-0.00268*GBP4-0.0013*RARRES3-0.00163 *APOBEC3G
34040608	Yuan_2021	CLEC4E,KLRD1,PSME1,KIR2DL4,CD274,GBP4	risk score=-0.07057*CLEC4E-0.06700*KLRD1-0.13834*PSME1-0.09894*KIR2DL4-0.04245*CD274-0.08261*GBP4
34291650	Tian_2021-1	KLRK1,KIR2DL4,IL18RAP,KIR3DL1,IL27	risk score=-0.223747467348802*KLRK1-0.0396703042539578*KIR2DL4-0.0188532070987305*IL18RAP-0.280680702726008*KIR3DL1-0.32145755755514*IL27
34335689	Bai_2021	CD276,UQCRFS1,HAPLN3,PIP4P1	risk score=0.35*CD276+0.75* UQCRFS1-0.41*HAPLN3-0.75*PIP4P1
34394351	Huang_2021	DNMT2,NSUN3,NSUN6,YBX1,NOP2	risk score=-0.01842*DNMT2-0.08767*NSUN3-0.07701*NSUN6+0.00057*YBX1+0.18925*NOP2
34434692	Tang_2021	RPL10A,EIF1B,TIPARP,RPL15,SLC25A38,PHLDA1,TFDP2,MEGF10	risk score=0.720*RPL10A-0.354*EIF1B-0.076*TIPARP-0.434*RPL15-0.066*SLC25A38-0.044*PHLDA1-0.397*TFDP2-0.017*MEGF10
34447410	Xu_2021-1	ALOX5,ANGPTL7,TXNIP,SLC2A6,GCH1	risk score=-0.18811*ALOX5-0.07911*ANGPTL7+0.13678*TXNIP+0.28800*SLC2A6-0.46713*GCH1
34517481	Wang _2021	RFPL1S,CTSV,EGLN3,ESRP1,HESX1,MANEA,PKP1,PRSS8	risk score=0.1846*RFPL1S+0.0440*CTSV+0.0651*EGLN3+0.1092*ESRP1-0.2125*HESX1-0.2613*MANEA+0.1473*PKP1-0.0959*PRSS8
34531901	Tian_2021-2	RPF1,RBM43,RPP25,APOBEC3G,PATL2,FBXO17,NYNRIN	risk score=-0.23148*RPF1-0.22826*RBM43+0.17848*RPP25-0.16324*APOBEC3G-0.34232*PATL2+0.12702*FBXO17+ 0.14216*NYNRIN
34630418	Liu_2021	ARPC1B,BTBD6 ,GUSB,KRTCAP2,RHBDD3,SLC39A4	risk score=3.8*ARPC1B+4.02*BTBD6+1.02*GUSB+2.10*KRTCAP2-6.65*RHBDD3+2.25*SLC39A4
34675611	Zeng_2021-2	ALOX5,CHAC1	risk score=-0.3258*ALOX5+0.1597*CHAC1
34721986	Wu_2021	GSDMC,GZMA,AIM2,PD-L1	risk score=0.2758*GSDMC-0.0699*GZMA-0.0526*AIM2-0.1766*PD-L1
34743576	Xia_2022	IL32,IRF1,SNX20,VAV1	risk score=1.6053524*IL32+0.9498871*IRF1-1.6222937*SNX20-2.0783539*VAV1
30556166	Li_2018	GJC1,TCEA1,MFSD3,FAF2,TLCD1,GPAA1,CYC1,ASAP1,JPH1,LDB3,KDELR3	risk score=1.10*GJC1+2.37*TCEA1+0.94*MFSD3+2.27*FAF2+0.88*TLCD1+0.98*GPAA1+1.01*CYC1+0.95*ASAP1+1.54*JPH1+1.60*LDB3+1.20*KDELR3
34804126	Xu_2021-2	CHAC1,CS,PML,GCH1,TFAP2C,NOX4,ALOX12B,GPX	risk score=0.125855936071576*CHAC1+0.560660638020698*CS-0.30765625698674*PML-0.308787668222114*GCH1-0.110257841756473*TFAP2C-0.06854182999606*NOX4+0.107841778270567*ALOX12B+0.125495051893846*GPX
34805163	Zhang_2021-2	SRGN,IDO1,RARRES3,CCL4,HLA-DPB1	risk score=-0.08*SRGN-0.04*IDO1-0.04*RARRES3-0.03*CCL4-0.007 *HLA-DPB1
34814288	Zhao_2021	MDH2,NME1,NT5C2,PC,ENPP1	risk score=2.761058*MDH2+1.384644*NME1+1.056515*NT5C2-1.443098*PC-0.732329*ENPP1
34901006	Cao_2021	ANO6,CEBPB,TMEM173,TXNIP,VIM	risk score=0.00750335379446634*ANO6+ 0.0110094507963823*CEBPB+0.00320430405522329*TMEM173-0.00165919015758192*TXNIP-9.89378996691334e-05*VIM
34903008	Niu_2022	GSDMA,GSDMC,AIM2,NOD2	risk score=0.038*GSDMA+0.310*GSDMC-0.028*AIM2-0.437*NOD2
35102195	Zhang_2022	GSDMC,GSDMD,IL6,NLRP6,PLCG1	risk score=1.730*GSDMC+0.318*GSDMD+1.735*IL6+2.540*NLRP6+0.186*PLCG1
35265521	Xie_2022	ISCU, MTO1,SLC25A3,HPD,SLC25A3, HPDL, NDUFA13,NARS2	risk score=-0.406*ISCU-0.415*MTO1+0.397*SLC25A3+0.113*HPDL+0.198*NDUFA13+0.129*NARS2
35300699	Lei_2022	EEFSEC,EEF1A2,ALDH1A3,CTNNB1,COMMD2	risk score=-0.422*EEFSEC+0.355*EEF1A2-0.349*ALDH1A3-0.274*CTNNB1-0.432*COMMD2
35309911	Liu_2022	CP,MAP1LC3A,TF,TP53	risk score=-0.09765*CP-0.05943*MAP1LC3A-0.02367*TF+0.03474*TP53
30569172	YI_2019	ACA17,ACA45,SNORD87,SNORD12	risk score=-1.602*ACA17+0.803*ACA45+0.603*SNORD87+1.348*SNORD12
35354376	Chen_2022	ACACA,ACSL4,ALOX5,ATP5MC3,CHAC1,CS,MT1G,ZEB1,ABCC1	risk score=0.05785*ACACA-0.14149*ACSL4-0.06033*ALOX5+0.04117*ATP5MC3+0.02936*CHAC1+0.25160*CS-0.00617*MT1G-0.09239* ZEB1+0.18878*ABCC1)
35390784	Guo_2022	SLC25A38,ABCA12,CA12,SYNJ2	risk score=-0.246*SLC25A38-0.50186*ABCA12+0.032*CA12+0.086*SYNJ2
35492358	Xu_2022	EMP3,TLR1,IFNGR2,IL15,CCL8,NLRP6,CCL25,RTP4	risk score=0.003*EMP3-0.065*TLR1-0.012*IFNGR2-0.288*IL15-0.057*CCL8-0.633*NLRP6-0.329*CCL25-0.024*RTP4
35722625	Yu_2022	ELAVL1,ABCF1,IGF2BP1	risk score=0.4333*ELAVL1+0.309*ABCF1+0.0476*IGF2BP1
35770115	Yuan_2022	CD14,CMKLR1,HCK,ITGB2,PTAFR	risk score=-0.02*CD14+0.1086*CMKLR1+0.0601*HCK-0.3108*ITGB2+0.0205*PTAFR
35855761	Li_2022-2	AIM2,NLRP6,IL-18,GSDMA,GSDMC	risk score=-0.119*AIM2-0.0487*NLRP6-0.374*IL-18+0.230*GSDMA+0.383*GSDMC
31786890	Sun_2019	PRKCD,ANKRD30A,GPR64,RHBDL3	risk score=-0.277*PRKCD+0.293*ANKRD30A+0.123*GPR64+0.441*RHBDL3
32309184	Li_2022-1	MANEAL,SLC44A3	risk score=-0.119*MANEAL-0.176*SLC44A3
32355756	Song_2020	DOCK10,CCDC7,SLA2,TNFSF14,PWP2,PFKFB3,UBE2L6,PHF11,TRIM14,REC8,SENP6,NLRP4	risk score=0.171*DOCK10-0.506*CCDC7-0.398*SLA2+0.761*TNFSF14-0.298*PWP2-0.223*PFKFB3-0.314*UBE2L6+0.007*PHF11+0.416*TRIM14-0.344*REC8-0.178*SENP6-0.246*NLRP4
32462000	Gao_2020	IQCE ,RFX6,GPAA1,BAHCC1,CLEC2B,AGAP2	risk score=0.2055267*IQCE + 0.244203*RFX6+ 0.1858435*GPAA1+0.2002694*BAHCC1-0.329238*CLEC2B-0.08811327*AGAP2
